# Supplementary material for: Rigid versions of PDTA4− incorporating a 1,3-diaminocyclobutyl spacer for Mn2+ complexation: stability, water exchange dynamics and relaxivity
Source: Royal Society of Chemistry journal article supplement (doi:10.1039/d1dt02498a), 2021-01-01
Supplement: d1dt02498a1.pdf [file d1dt02498a1.pdf]

## Electronic Supplementary Information (ESI)

# Rigid versions of PDTA<sup>4-</sup> incorporating a 1,3-diaminocyclobutyl spacer for Mn<sup>2+</sup> complexation: stability, water exchange dynamics and relaxivity

Rocío Uzal-Varela,<sup>a</sup> Daniela Lalli,<sup>b</sup> Isabel Brandariz,<sup>a</sup> Aurora Rodríguez-Rodríguez,<sup>\*,a</sup>  
Carlos Platas-Iglesias,<sup>a</sup> Mauro Botta,<sup>b</sup> and David Esteban-Gómez<sup>a</sup>

<sup>a</sup> Universidade da Coruña, Centro de Investigacións Científicas Avanzadas (CICA) and Departamento de  
Química Fundamental, Facultade de Ciencias, 15071, A Coruña, Galicia, Spain.

<sup>b</sup> Magnetic Resonance Platform (PRISMA-UPO), Dipartimento di Scienze e Innovazione Tecnologica,  
Università del Piemonte Orientale "A. Avogadro", Viale T. Michel 11, 15121 Alessandria, Italy.

## Summary

|                                                                                                                                                                                                                                                                                                                                   |    |
|-----------------------------------------------------------------------------------------------------------------------------------------------------------------------------------------------------------------------------------------------------------------------------------------------------------------------------------|----|
| <b>Dissociation kinetics</b> .....                                                                                                                                                                                                                                                                                                | 4  |
| <b>Figure S1.</b> Absorption spectra of the $[\text{Mn}(\text{L1})]^{2-}\text{-Zn}^{2+}$ reacting system before (bold trend) and 5 min after (red trend) the mixing of the reactant ( $[\text{MnL}]=0.25$ mM, $[\text{Zn}^{2+}]=1.25$ mM, $[\text{HEPES}]=0.01$ M, $\text{pH}=7.4$ , $l=0.874$ cm, $0.15$ M NaCl, $25$ °C). ..... | 7  |
| <b>Figure S2.</b> Pseudo-first-order rate constant ( $k_d$ ) characterising the transmetallation reaction between $[\text{Mn}(\text{L1})]^{2-}$ and $\text{Zn}^{2+}$ ( $[\text{MnL}]_t=0.25$ mM, $[\text{HEPES}]=0.01$ M, $0.15$ M NaCl, $25$ °C) .....                                                                           | 7  |
| <b>Figure S3.</b> Absorption spectra of the different protonated forms of the $\text{L2}^{2-}$ ligand calculated from spectrophotometric titrations in aqueous solution ( $0.15$ M NaCl, $25^\circ$ ). .....                                                                                                                      | 8  |
| <b>Figure S4.</b> Absorption spectrum recorded from an equimolar mixture of $\text{L2}^{2-}$ and $\text{Mn}^{2+}$ ( $9.11\times 10^{-5}$ M, $\text{pH}$ 4.75, $0.15$ M NaCl, $25^\circ\text{C}$ , circles), fitted spectrum (green line) and spectral contributions of the different species present in solution. ....            | 9  |
| <b>Figure S5.</b> Absorption spectral changes observed during the formation of the $[\text{Mn}(\text{L2})]$ complex in aqueous solution in the $\text{pH}$ range 3.9-6.9 ( $0.15$ M NaCl, $25^\circ\text{C}$ ). .....                                                                                                             | 10 |
| <b>Figure S6.</b> Potentiometric titrations of the $\text{L1}^{4-}$ ligand ( $3.92$ mM) in the absence and in the presence of one equivalent of $\text{Mn}^{2+}$ ( $0.15$ M NaCl, $25^\circ\text{C}$ ).....                                                                                                                       | 11 |
| <b>Figure S7.</b> $^1\text{H}$ NMR spectrum of compound <b>1</b> ( $500$ MHz, $\text{CDCl}_3$ , $298$ K).....                                                                                                                                                                                                                     | 12 |
| <b>Figure S8.</b> $^{13}\text{C}$ NMR spectrum of compound <b>1</b> ( $101$ MHz, $\text{CDCl}_3$ , $298$ K).....                                                                                                                                                                                                                  | 12 |
| <b>Figure S9.</b> Experimental high resolution mass spectrum ( $\text{ESI}^+$ ) of compound <b>1</b> . ....                                                                                                                                                                                                                       | 13 |
| <b>Figure S10.</b> $^1\text{H}$ NMR spectrum of $\text{H}_4\text{L1}$ ( $500$ MHz, $\text{D}_2\text{O}$ , $\text{pH}$ 1.70, $298$ K).....                                                                                                                                                                                         | 14 |
| <b>Figure S11.</b> $^{13}\text{C}$ NMR spectrum of $\text{H}_4\text{L1}$ ( $126$ MHz, $\text{D}_2\text{O}$ , $\text{pH}$ 1.70, $298$ K).....                                                                                                                                                                                      | 14 |
| <b>Figure S12.</b> Experimental high resolution mass spectrum ( $\text{ESI}^-$ ) of $\text{H}_4\text{L1}$ . ....                                                                                                                                                                                                                  | 15 |
| <b>Figure S13.</b> $^1\text{H}$ NMR spectrum of $\text{H}_2\text{L3}$ ( $500$ MHz, $\text{D}_2\text{O}$ , $\text{pH}$ = 2.10, $298$ K).....                                                                                                                                                                                       | 16 |
| <b>Figure S14.</b> $^{13}\text{C}$ NMR spectrum of $\text{H}_2\text{L3}$ ( $126$ MHz, $\text{D}_2\text{O}$ , $\text{pH}$ = 2.10, $298$ K).....                                                                                                                                                                                    | 16 |
| <b>Figure S15.</b> $^1\text{H}$ NMR spectrum of $\text{H}_2\text{L3}$ ( $300$ MHz, $\text{D}_2\text{O}$ , $\text{pH}$ = 2.10, $343$ K).....                                                                                                                                                                                       | 17 |
| <b>Figure S16.</b> $^{13}\text{C}$ NMR spectrum of $\text{H}_2\text{L3}$ ( $75.5$ MHz, $\text{D}_2\text{O}$ , $\text{pH}$ =2.10, $343$ K).....                                                                                                                                                                                    | 17 |
| <b>Figure S17.</b> Experimental high resolution mass spectrum ( $\text{ESI}^+$ ) of $\text{H}_2\text{L3}$ .....                                                                                                                                                                                                                   | 18 |
| <b>Figure S18.</b> $^1\text{H}$ NMR spectrum of compound <b>2</b> ( $300$ MHz, $\text{CDCl}_3$ , $298$ K).....                                                                                                                                                                                                                    | 19 |
| <b>Figure S19.</b> $^{13}\text{C}$ NMR spectrum of compound <b>2</b> ( $75.5$ MHz, $\text{CDCl}_3$ , $298$ K).....                                                                                                                                                                                                                | 19 |

|                                                                                                                                                                           |    |
|---------------------------------------------------------------------------------------------------------------------------------------------------------------------------|----|
| <b>Figure S20.</b> Experimental high resolution mass spectrum (ESI <sup>+</sup> ) of compound <b>2</b> . .....                                                            | 20 |
| <b>Figure S21.</b> <sup>1</sup> H NMR spectrum of compound <b>3</b> (400 MHz, CDCl <sub>3</sub> , 298 K).....                                                             | 21 |
| <b>Figure S22.</b> <sup>13</sup> C NMR spectrum of compound <b>3</b> (101 MHz, CDCl <sub>3</sub> , 298 K).....                                                            | 21 |
| <b>Figure S23.</b> Experimental high resolution mass spectrum (ESI <sup>+</sup> ) of compound <b>3</b> . .....                                                            | 22 |
| <b>Figure S24.</b> <sup>1</sup> H NMR spectrum of <b>H<sub>2</sub>L2</b> (500 MHz, D <sub>2</sub> O, pH 4.33, 298 K).....                                                 | 23 |
| <b>Figure S25.</b> <sup>13</sup> C NMR spectrum of <b>H<sub>2</sub>L2</b> (126 MHz, D <sub>2</sub> O, pH 4.33, 298 K).....                                                | 23 |
| <b>Figure S26.</b> Experimental high resolution mass spectrum (ESI <sup>+</sup> ) of <b>H<sub>2</sub>L2</b> .....                                                         | 24 |
| <b>Table S1.</b> Optimized Cartesian coordinates obtained for [Mn( <b>EDTA</b> )(H <sub>2</sub> O)] <sup>2-</sup> ·5H <sub>2</sub> O<br>(M11/Def2-TZVPP, scrf=pcm). ..... | 25 |
| <b>Table S2.</b> Optimized Cartesian coordinates obtained for [Mn( <b>L1</b> )(H <sub>2</sub> O)] <sup>2-</sup> ·5H <sub>2</sub> O<br>(M11/Def2-TZVPP, scrf=pcm). .....   | 27 |
| <b>Table S3.</b> Optimized Cartesian coordinates obtained for [Mn( <b>L2</b> )(H <sub>2</sub> O)]·2H <sub>2</sub> O<br>(M11/Def2-TZVPP, scrf=pcm). .....                  | 29 |
| <b>Table S4.</b> Optimized Cartesian coordinates obtained for [Mn( <b>L3</b> )(H <sub>2</sub> O)]·2H <sub>2</sub> O<br>(M11/Def2-TZVPP, scrf=pcm). .....                  | 31 |
| <b>References</b> .....                                                                                                                                                   | 33 |

## Dissociation kinetics

The rates of the transmetallation reactions (Eq. (S1)) between  $[\text{Mn}(\mathbf{L1})]^{2-}$  and  $\text{Zn}^{2+}$  were studied by spectrophotometry. Some characteristic absorption spectra of the  $[\text{Mn}(\mathbf{L1})]^{2-} - \text{Zn}^{2+}$  system are shown in Figure S1.

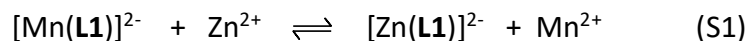

According to the spectrophotometric studies of the transmetallation reaction between  $[\text{Mn}(\mathbf{L1})]^{2-}$  and  $\text{Zn}^{2+}$  (Figure S1), the replacement of the  $\text{Mn}^{2+}$ -ion with  $\text{Zn}^{2+}$  results in the decreases of the absorbance values at  $<235$  nm. Based on the spectral changes, it might be assumed that the absorption band of the carboxylate groups of  $[\text{Mn}(\mathbf{L1})]^{2-}$  is shifted to the lower wavelength range by the formation of  $[\text{Zn}(\mathbf{L1})]^{2-}$  due to the stronger interaction between the  $-\text{COO}^-$  and the  $\text{Zn}^{2+}$  ion compared to the  $\text{Mn}^{2+}$  ion. Moreover, the relatively short reaction timescale of the transmetallation process obtained from the spectrophotometric studies was also confirmed by the investigation of the  $[\text{Mn}(\mathbf{L1})]^{2-} - \text{Zn}^{2+}$  reacting system with  $T_1$  measurements.

In the presence of excess of the exchanging ion, the transmetallation can be treated as a pseudo-first-order process and the reaction rate can be expressed with Eq. (S2), where  $k_d$  is a pseudo-first-order rate constant and  $[\text{MnL}]_t$  is the total concentration of the  $\text{Mn}^{2+}$ -complex.

$$-\frac{d[\text{MnL}]_t}{dt} = k_d[\text{MnL}]_t \quad (\text{S2})$$

The rates of the transmetallation reactions were studied at different concentrations of the exchanging metal ion at  $\text{pH}=7.4$ . The obtained pseudo-first order rate constants  $k_d$  are presented in Figure S2 as a function of  $[\text{Zn}^{2+}]$ .

At  $\text{pH} = 7.4$  the  $k_d$  values increase with  $[\text{Zn}^{2+}]$ . The dependence of  $k_d$  on the  $[\text{Zn}^{2+}]$  can be expressed as a first-order function of  $[\text{Zn}^{2+}]$  which indicates that the exchange can take place by  $\text{Zn}^{2+}$ -independent and  $\text{Zn}^{2+}$ -assisted dissociation pathways. The  $\text{Zn}^{2+}$ -independent pathway can be explained by the spontaneous dissociation of  $[\text{Mn}(\mathbf{L1})]^{2-}$  ( $k_0$ , Eq. (S3)), which is followed by the rapid reaction of the free ligand with the exchanging  $\text{Zn}^{2+}$  ion. The  $\text{Zn}^{2+}$  assisted reaction can be interpreted by the direct attack

of the exchanging metal ion on the  $[\text{Mn}(\mathbf{L1})]^{2-}$  complex via the formation of dinuclear intermediate characterized by the  $K^*_{\text{MnLZn}}$  stability constant (Eq. (S4)). In the case of the  $[\text{Mn}(\mathbf{EDTA})]^{2-}$ ,  $[\text{Mn}(\mathbf{CDTA})]^{2-}$  and  $[\text{Mn}(\mathbf{PDTA})]^{2-}$  complexes the formation of the hetero-dinuclear complexes with  $\text{Cu}^{2+}$  was also detected by spectrophotometry.<sup>1</sup>

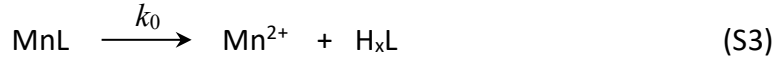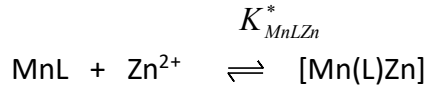

$$K^*_{\text{MnLZn}} = \frac{[\text{Mn}(\text{L})\text{Zn}]}{[\text{MnL}][\text{Zn}^{2+}]} \quad (\text{S4})$$

It can be assumed that in the dinuclear intermediate  $\text{Mn}(\text{L})\text{Zn}$ , the functional groups of the  $\mathbf{L1}^{4-}$  ligand are slowly transferred from  $\text{Mn}^{2+}$  to the attacking  $\text{Zn}^{2+}$  ion ( $k_{\text{MnLZn}}$ , Eq. (S5)).

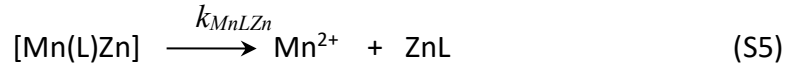

By taking into account all the possible pathways, the rate of the transmetallation of  $[\text{Mn}(\mathbf{L1})]^{2-}$  with  $\text{Zn}^{2+}$  can be expressed by Eq. (S6), where  $[\text{MnL}]$  and  $[\text{Mn}(\text{L})\text{Zn}]$  are the concentrations of the free and dinuclear complexes, respectively:

$$-\frac{d[\text{MnL}]_t}{dt} = k_d[\text{MnL}]_t = k_0[\text{MnL}] + k_{\text{MnLZn}}[\text{Mn}(\text{L})\text{Zn}] \quad (\text{S6})$$

Thus, the pseudo-first-order rate constant ( $k_d$ ) can be expressed as in (Eq. (S7)) considering the total concentration of  $[\text{Mn}(\mathbf{L1})]^{2-}$  ( $[\text{MnL}]_t = [\text{MnL}] + [\text{Mn}(\text{L})\text{Zn}]$ ), the stability constant of the dinuclear  $[\text{Mn}(\text{L})\text{Zn}]$  intermediate ( $K^*_{\text{MnLZn}}$ , Eq. (S4)) and Eq. (S6)).

$$k_{\text{obs}} = \frac{k_0 + k_3^{\text{Zn}}[\text{Zn}^{2+}]}{1 + K^*_{\text{MnLZn}}[\text{Zn}^{2+}]} \quad (\text{S7})$$

The rate constants  $k_1 = k_{\text{GdH2L}} \times K^{\text{H}}_{\text{GdHL}}$  and  $k_3 = k_{\text{GdLCu}} \times K_{\text{GdLCu}}$  characterise the spontaneous and  $\text{Zn}^{2+}$ -assisted dissociation of  $[\text{Mn}(\mathbf{L1})]^{2-}$ , respectively. The stability constant of dinuclear  $[\text{Mn}(\text{L})\text{Zn}]$  intermediates formed with the rigid ligand are relatively small (e.g.  $[\text{Mn}(\mathbf{CDTA})\text{Cu}]$ :  $K^*_{\text{MnLCu}}=79$ ).<sup>1</sup> By taking into account the very low stability constant of the  $[\text{Mn}(\mathbf{L1})\text{Zn}]$  intermediate ( $K^*_{\text{MnLCu}} < 100$ ), the denominator of Eq. (S7) can be neglected ( $1 \gg K^*_{\text{MnLZn}}[\text{Zn}^{2+}]$ ), so Eq. (S7) can be simplified in the form of Eq. (S8). The

$k_0$  and  $k_3^{Zn}$  values have been calculated by fitting of the kinetic data (Figure S2) to Eq. (S8).

$$k_{obs} = k_0 + k_3^{Zn} [Zn^{2+}] \quad (S8)$$

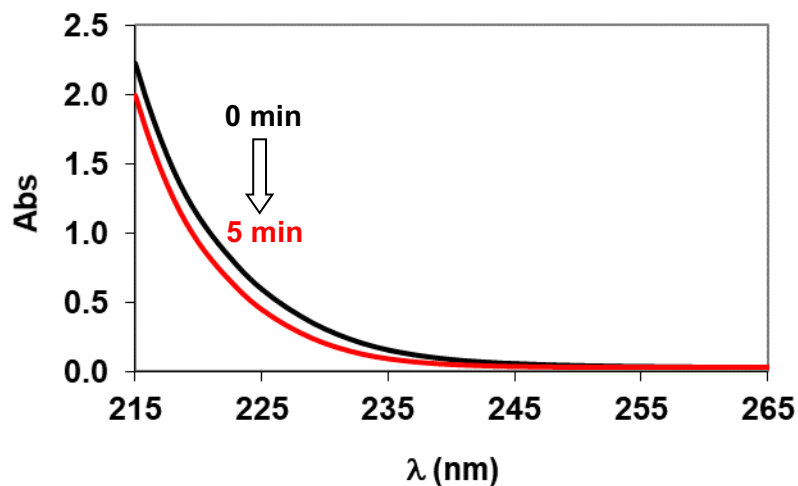

**Figure S1.** Absorption spectra of the  $[\text{Mn}(\text{L1})]^{2-}\text{-Zn}^{2+}$  reacting system before (black trace) and 5 min after (red trace) the mixing of the reactant ( $[\text{MnL}]=0.25$  mM,  $[\text{Zn}^{2+}]=1.25$  mM,  $[\text{HEPES}]=0.01$  M,  $\text{pH}=7.4$ ,  $l=0.874$  cm,  $0.15$  M NaCl,  $25$  °C).

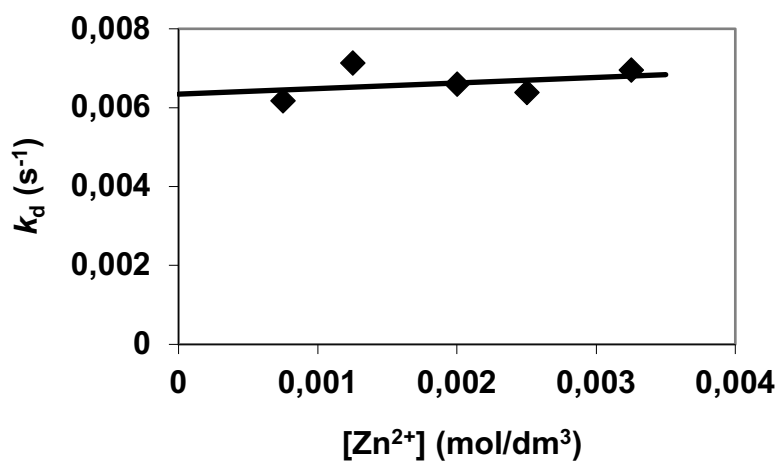

**Figure S2.** Pseudo-first-order rate constant ( $k_d$ ) characterising the transmetallation reaction between  $[\text{Mn}(\text{L1})]^{2-}$  and  $\text{Zn}^{2+}$  ( $[\text{MnL}]_t=0.25$  mM,  $[\text{HEPES}]=0.01$  M,  $0.15$  M NaCl,  $25$  °C).

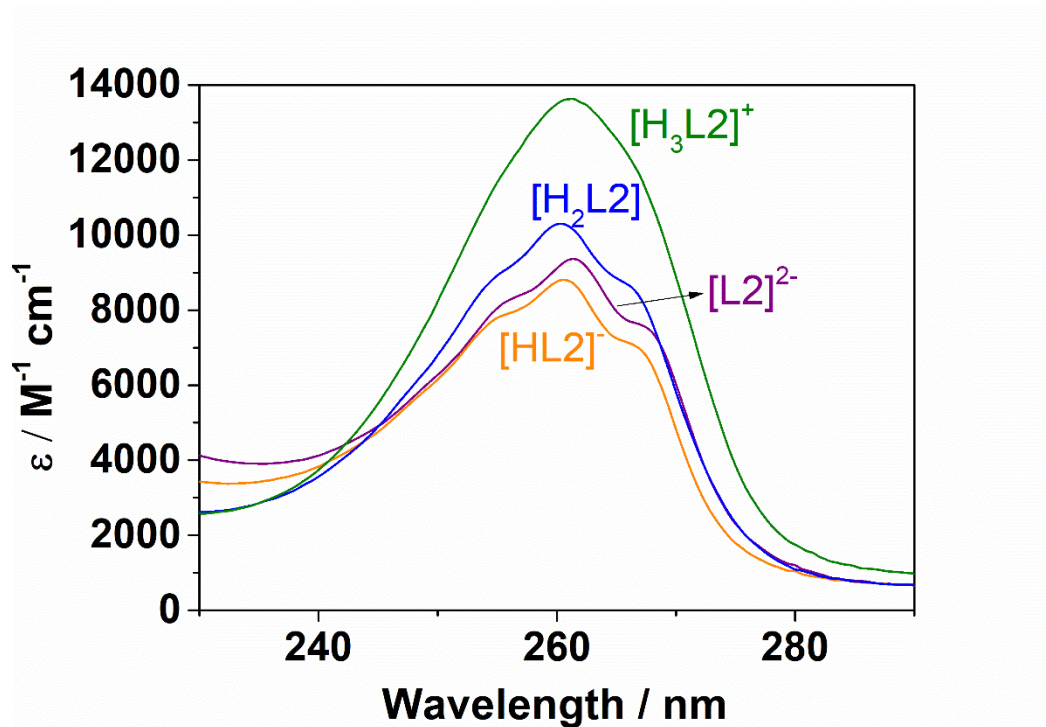

**Figure S3.** Absorption spectra of the different protonated forms of the  $\text{L}_2^{2-}$  ligand calculated from spectrophotometric titrations in aqueous solution (0.15 M NaCl, 25°).



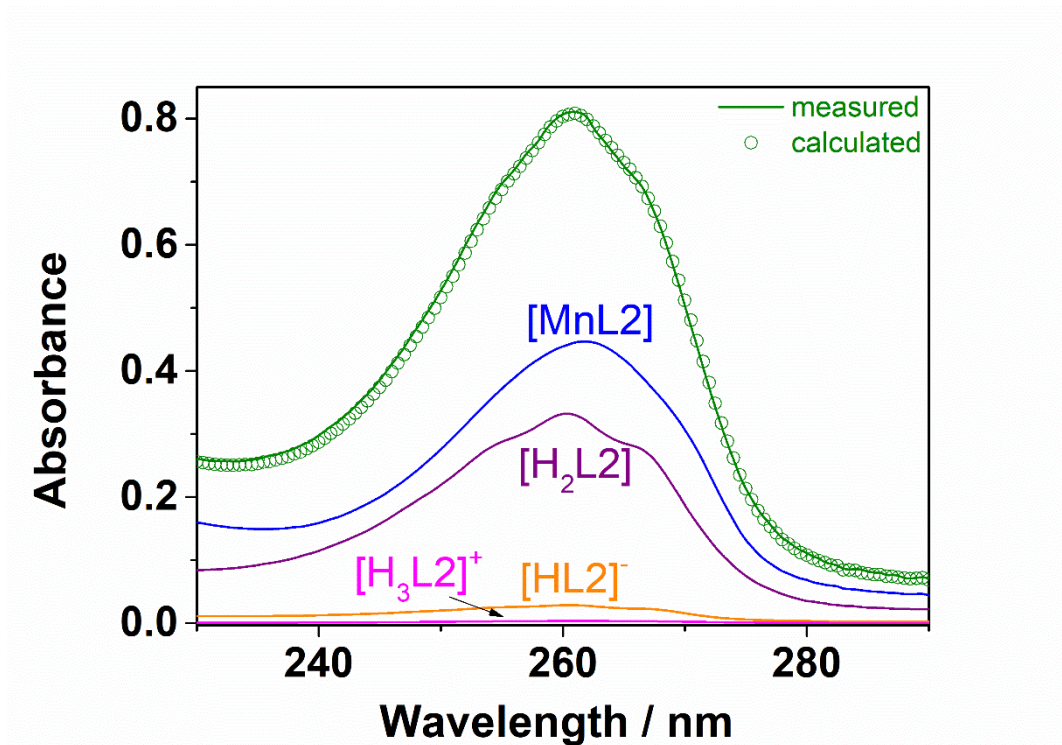

**Figure S4.** Absorption spectrum recorded from an equimolar mixture of  $L2^{2-}$  and  $Mn^{2+}$  ( $9.11 \times 10^{-5}$  M, pH 4.75, 0.15 M NaCl, 25°C, circles), fitted spectrum (green line) and spectral contributions of the different species present in solution.

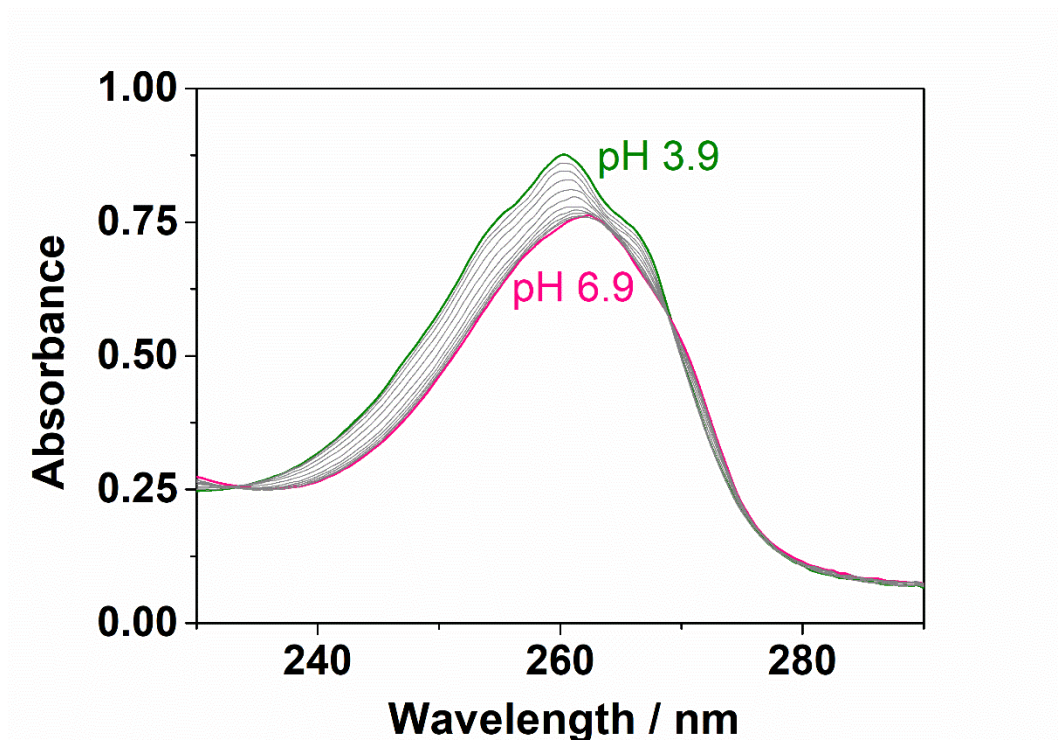

**Figure S5.** Absorption spectral changes observed during the formation of the [Mn(L2)] complex in aqueous solution in the pH range 3.9-6.9 (0.15 M NaCl, 25°C.).

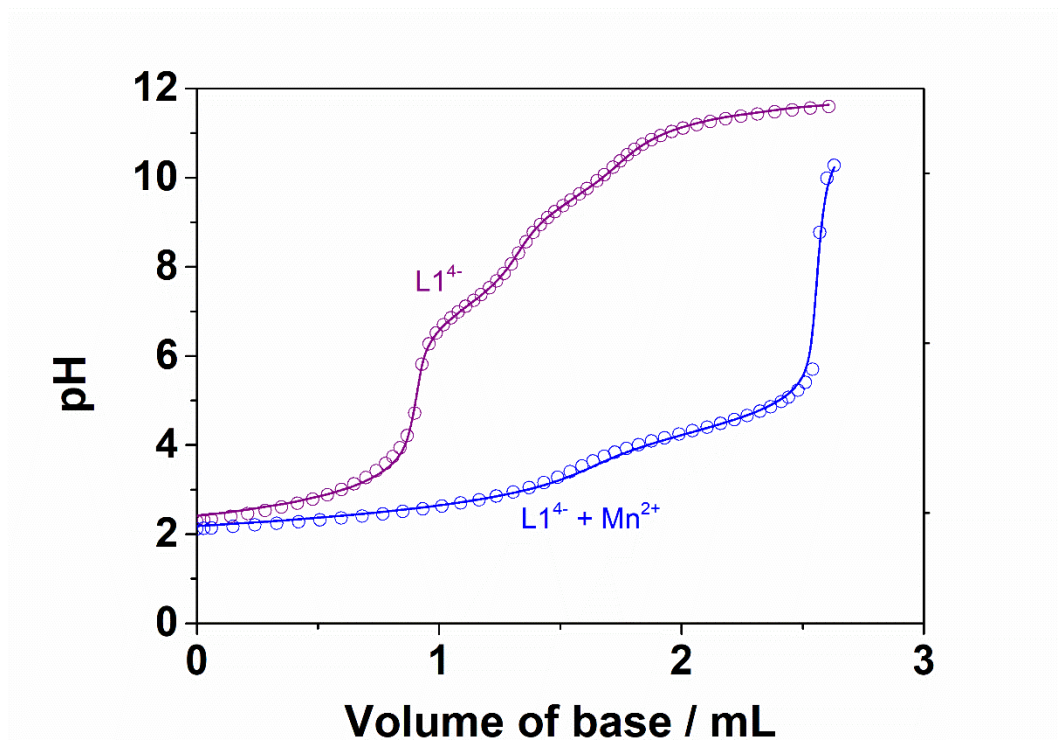

**Figure S6.** Potentiometric titrations of the **L1<sup>4-</sup>** ligand (3.92 mM) in the absence and in the presence of one equivalent of **Mn<sup>2+</sup>** (0.15 M NaCl, 25°C)

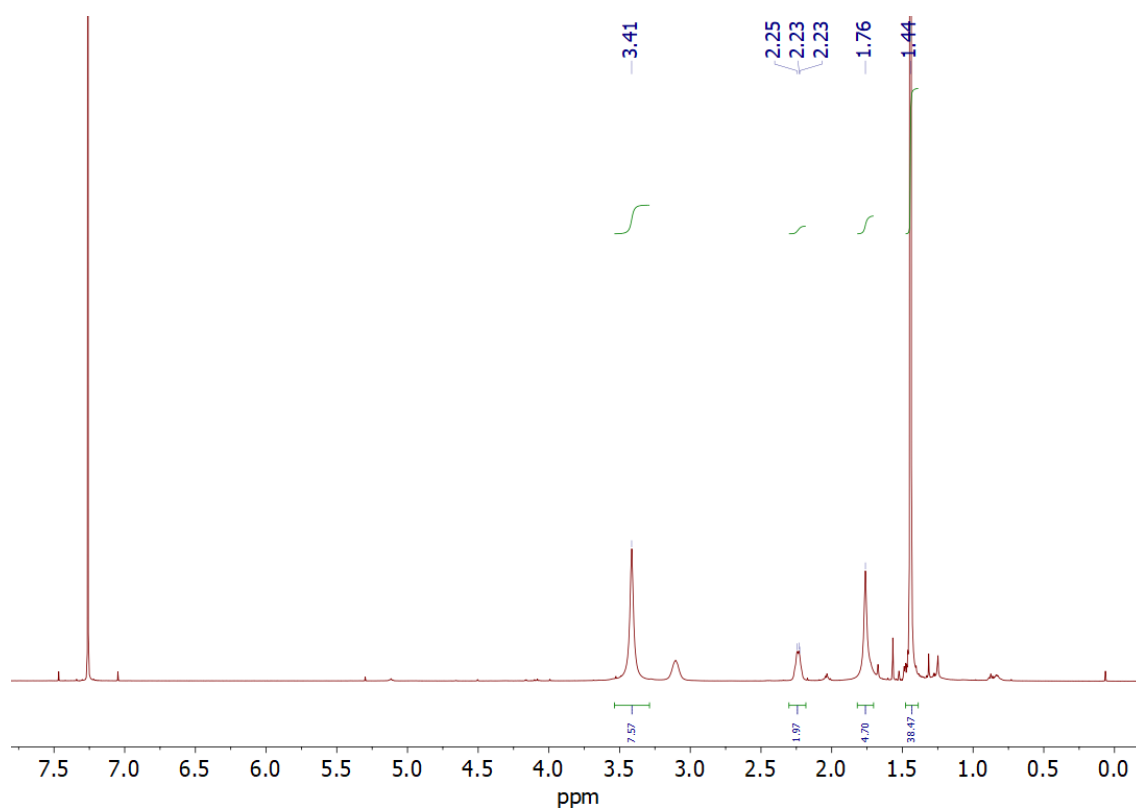

**Figure S7.**  $^1\text{H}$  NMR spectrum of compound **1** (500 MHz,  $\text{CDCl}_3$ , 298 K).

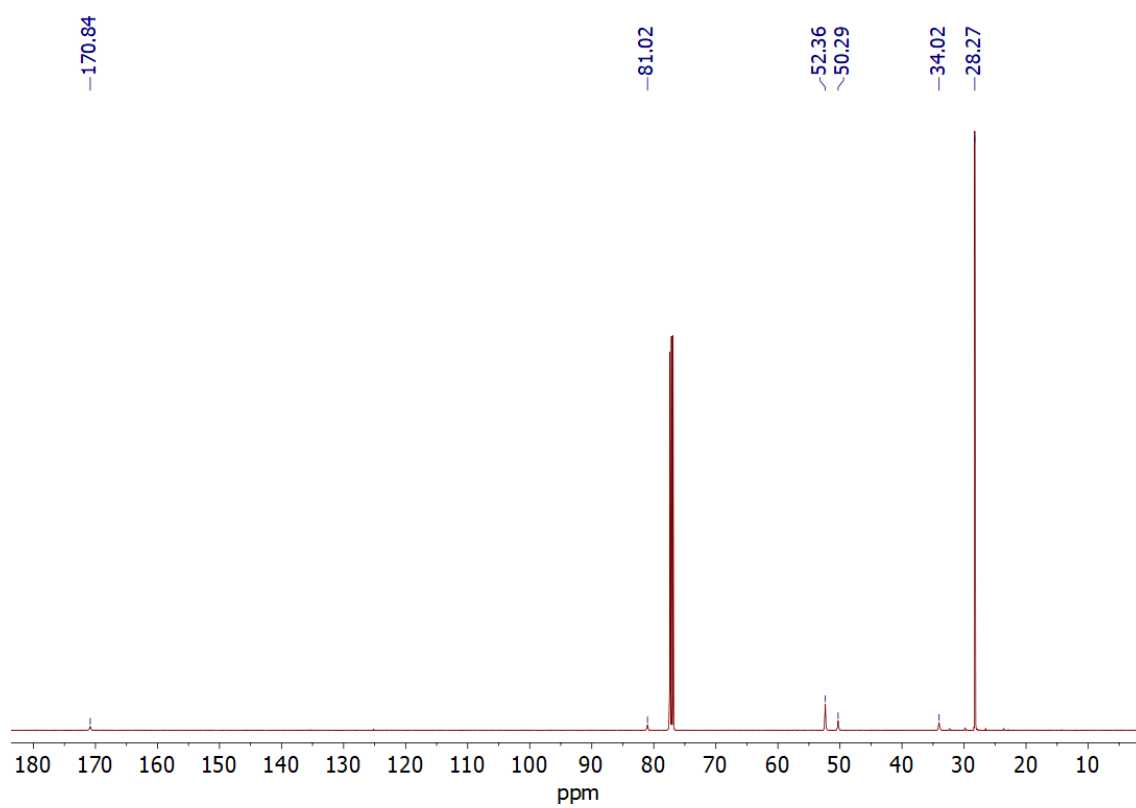

**Figure S8.**  $^{13}\text{C}$  NMR spectrum of compound **1** (101 MHz,  $\text{CDCl}_3$ , 298 K).

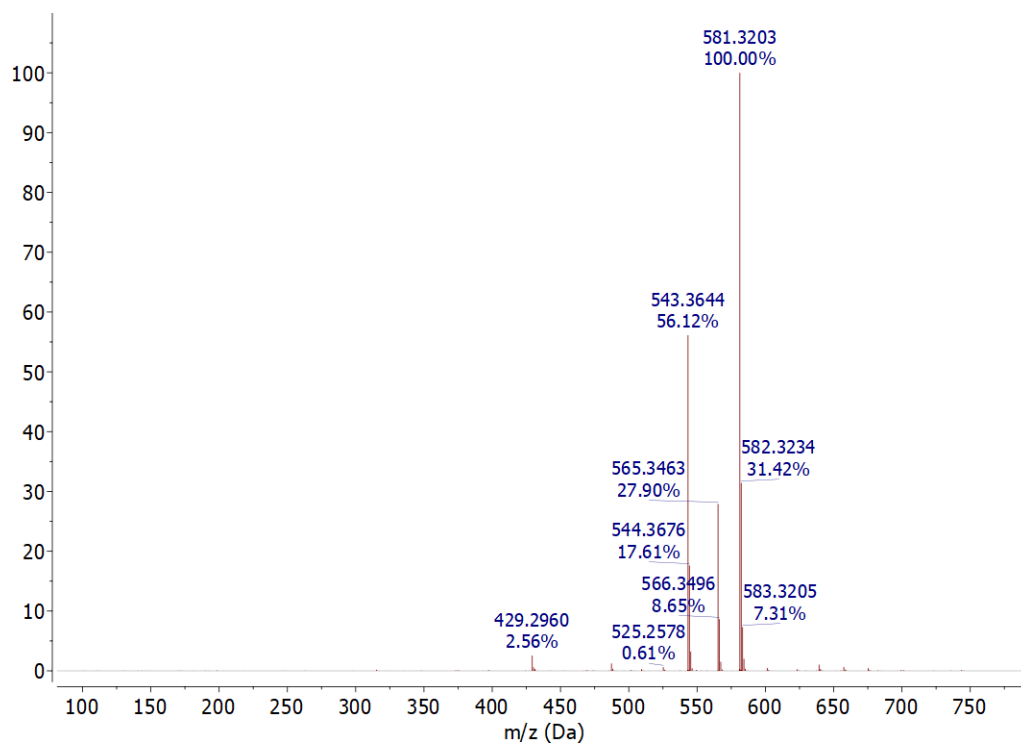

**Figure S9.** Experimental high resolution mass spectrum (ESI<sup>+</sup>) of compound **1**.

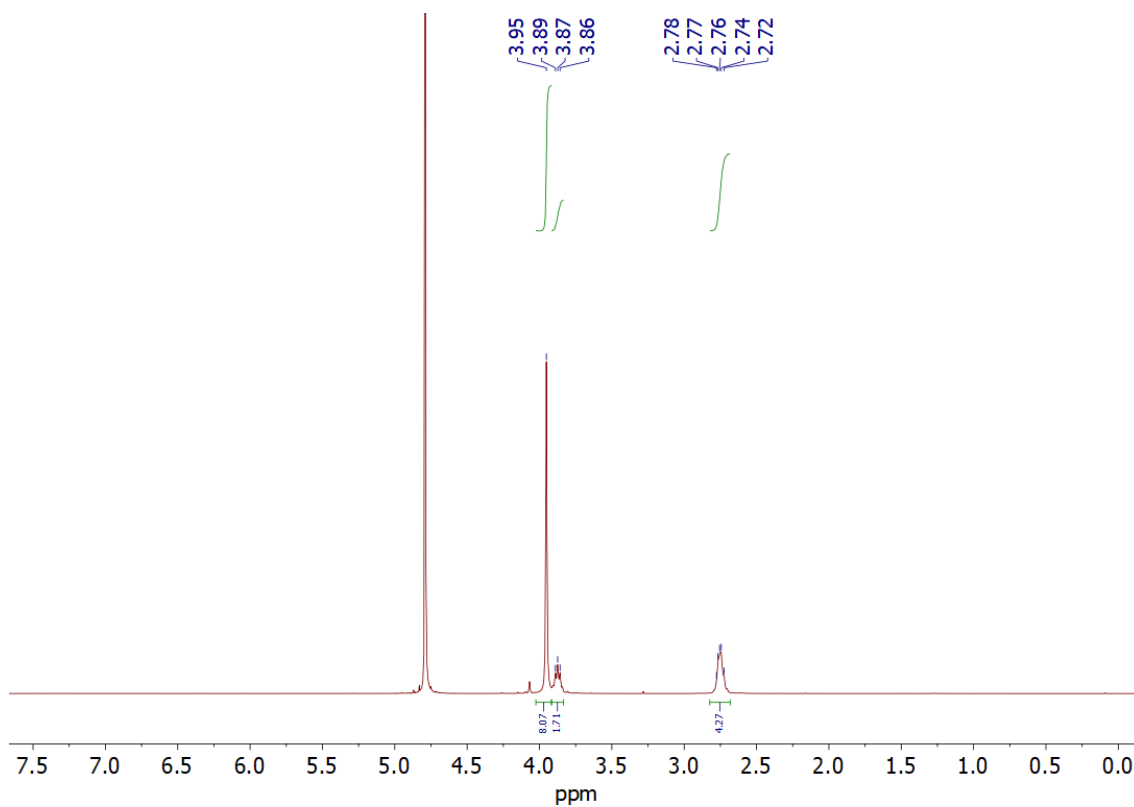

**Figure S10.**  $^1\text{H}$  NMR spectrum of **H<sub>4</sub>L1** (500 MHz, D<sub>2</sub>O, pH 1.70, 298 K).

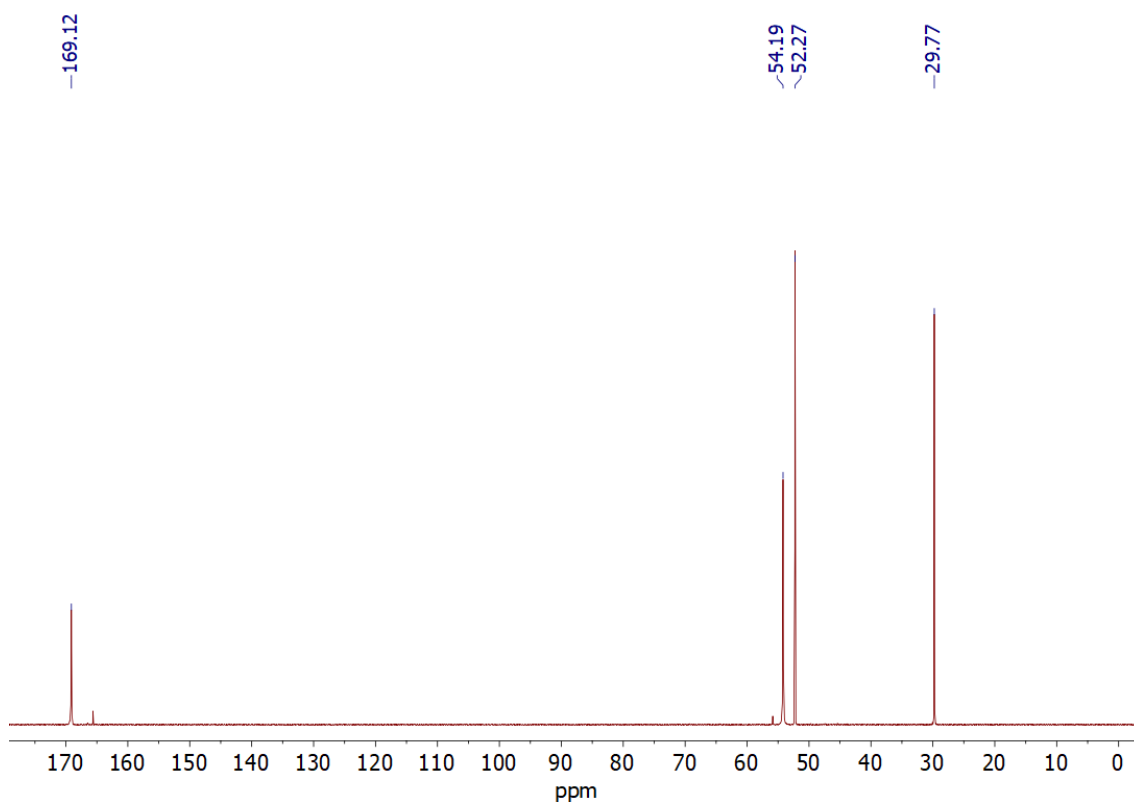

**Figure S11.**  $^{13}\text{C}$  NMR spectrum of **H<sub>4</sub>L1** (126 MHz, D<sub>2</sub>O, pH 1.70, 298 K).

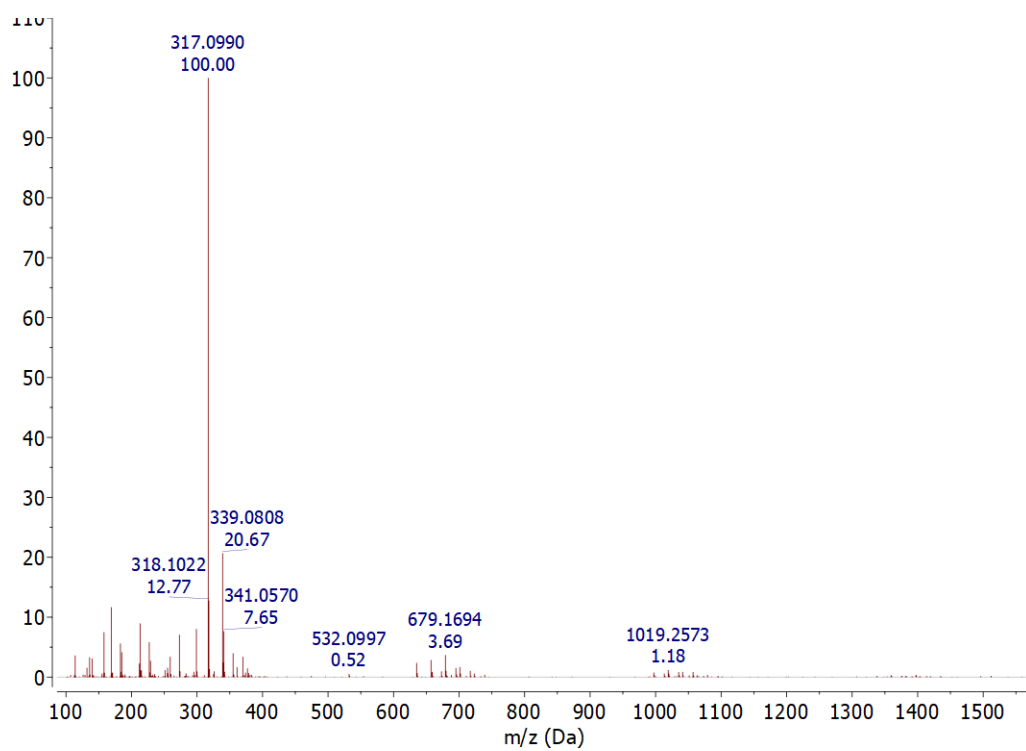

**Figure S12.** Experimental high resolution mass spectrum (ESI<sup>-</sup>) of H<sub>4</sub>L1.

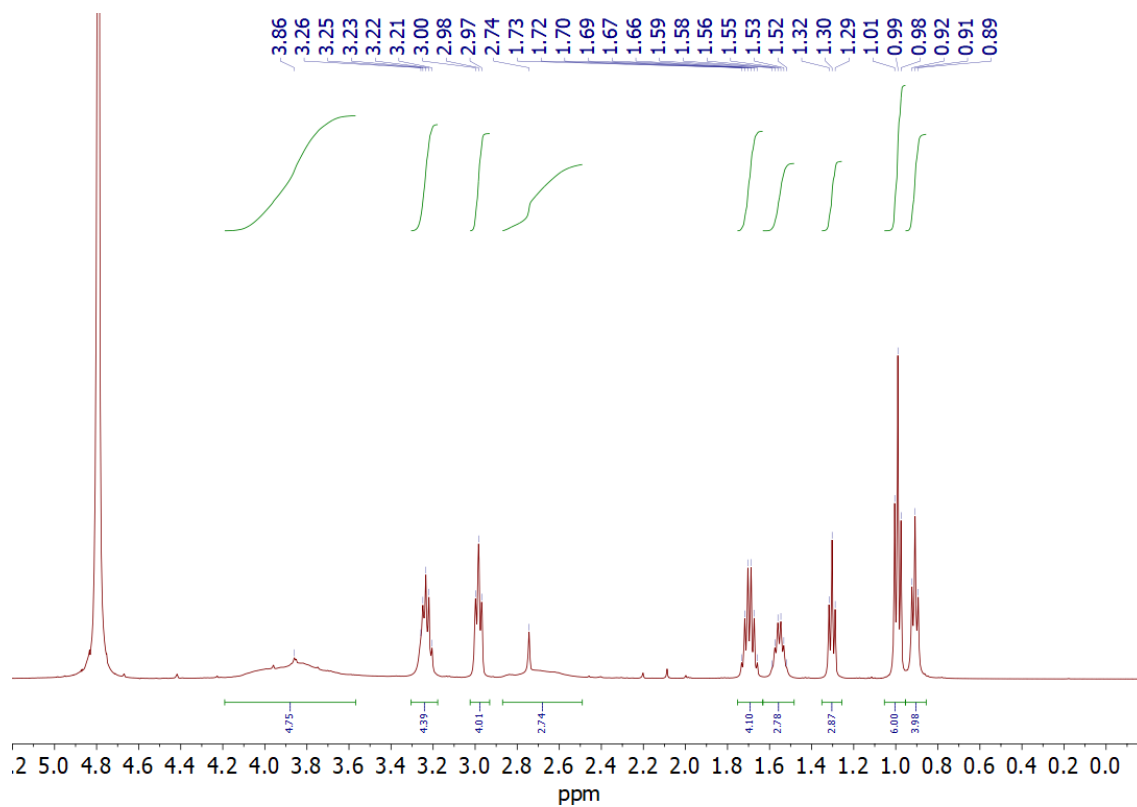

**Figure S13.**  $^1\text{H}$  NMR spectrum of  $\text{H}_2\text{L3}$  (500 MHz,  $\text{D}_2\text{O}$ , pH = 2.10, 298 K).

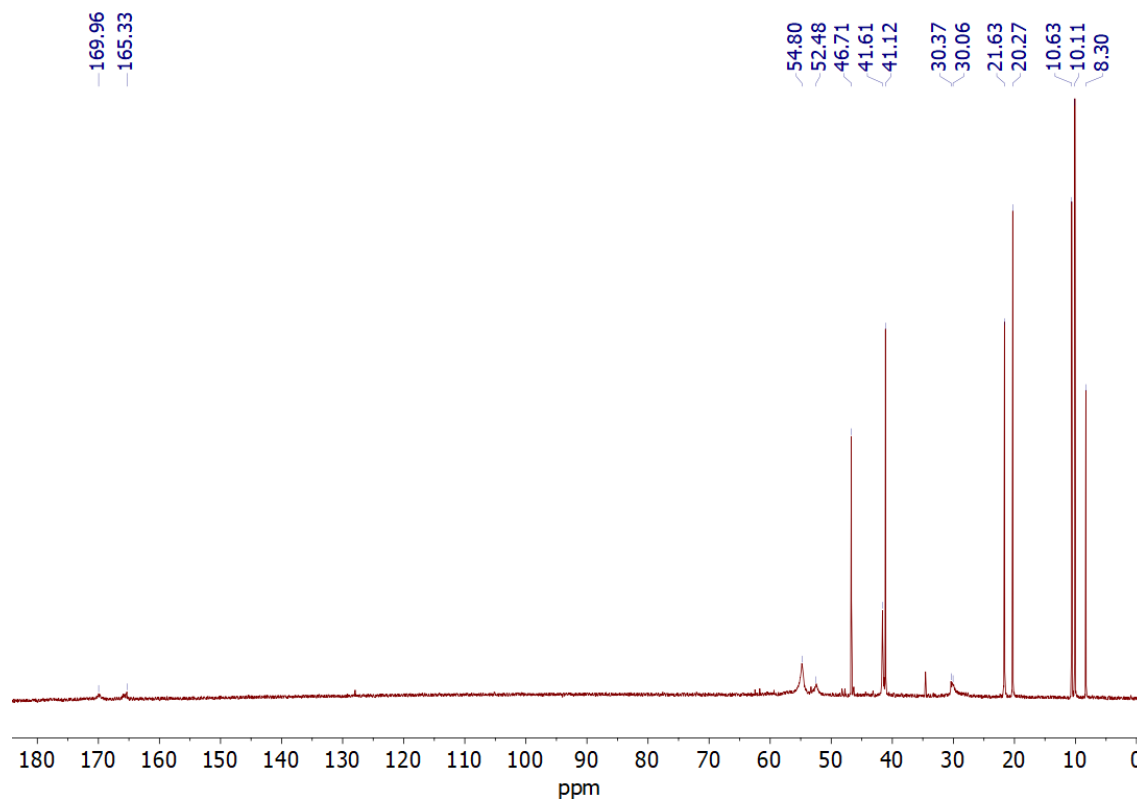

**Figure S14.**  $^{13}\text{C}$  NMR spectrum of  $\text{H}_2\text{L3}$  (126 MHz,  $\text{D}_2\text{O}$ , pH = 2.10, 298 K).



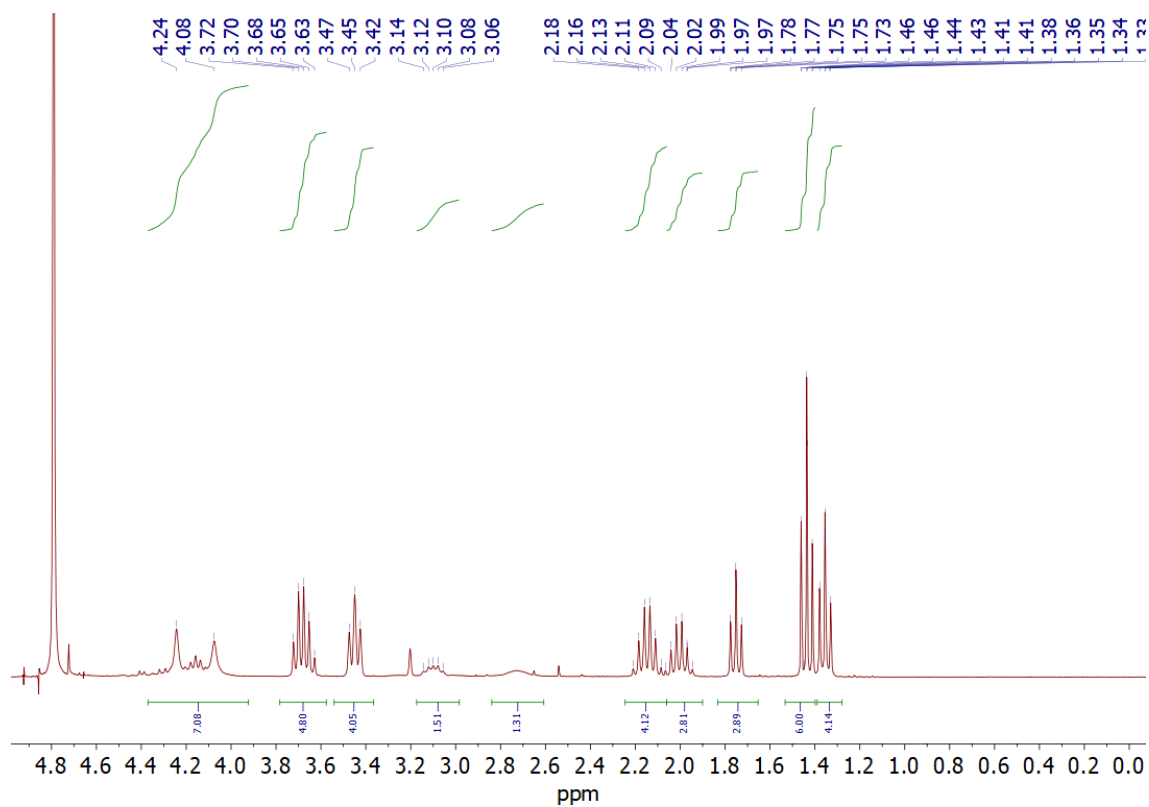

**Figure S15.** <sup>1</sup>H NMR spectrum of H<sub>2</sub>L3 (300 MHz, D<sub>2</sub>O, pH = 2.10, 343 K).

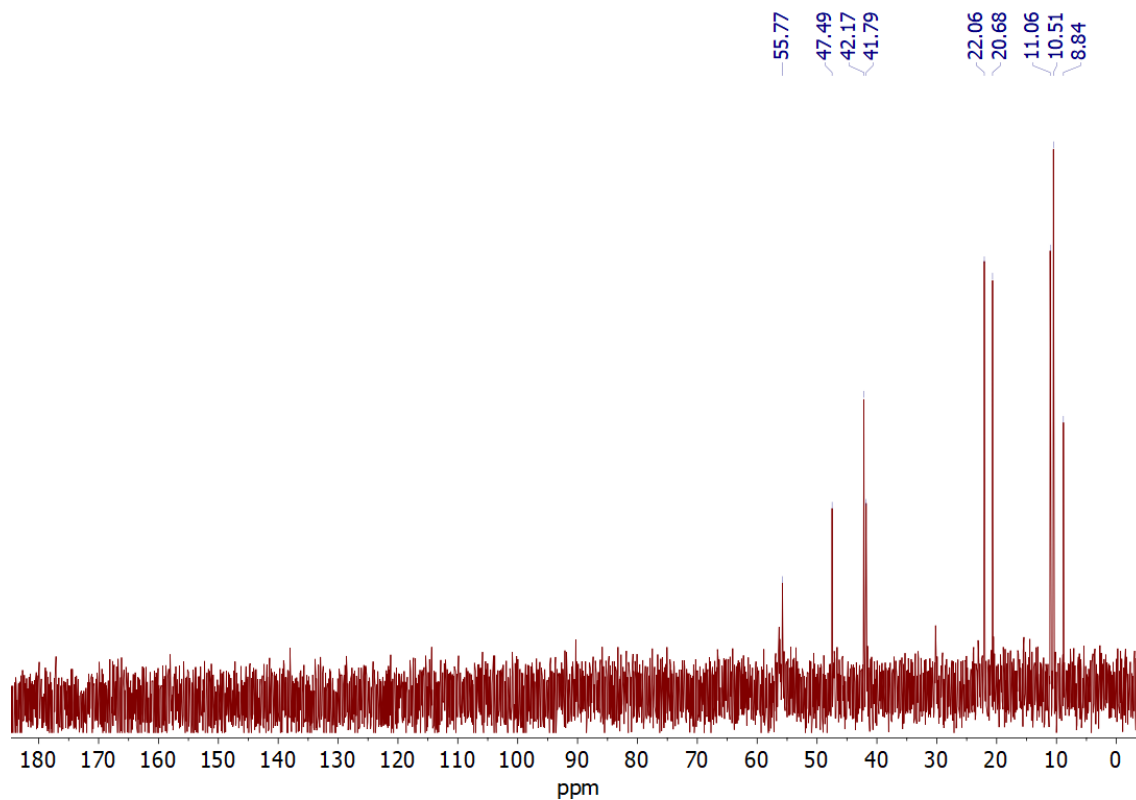

**Figure S16.** <sup>13</sup>C NMR spectrum of H<sub>2</sub>L3 (75.5 MHz, D<sub>2</sub>O, pH = 2.10, 343 K).

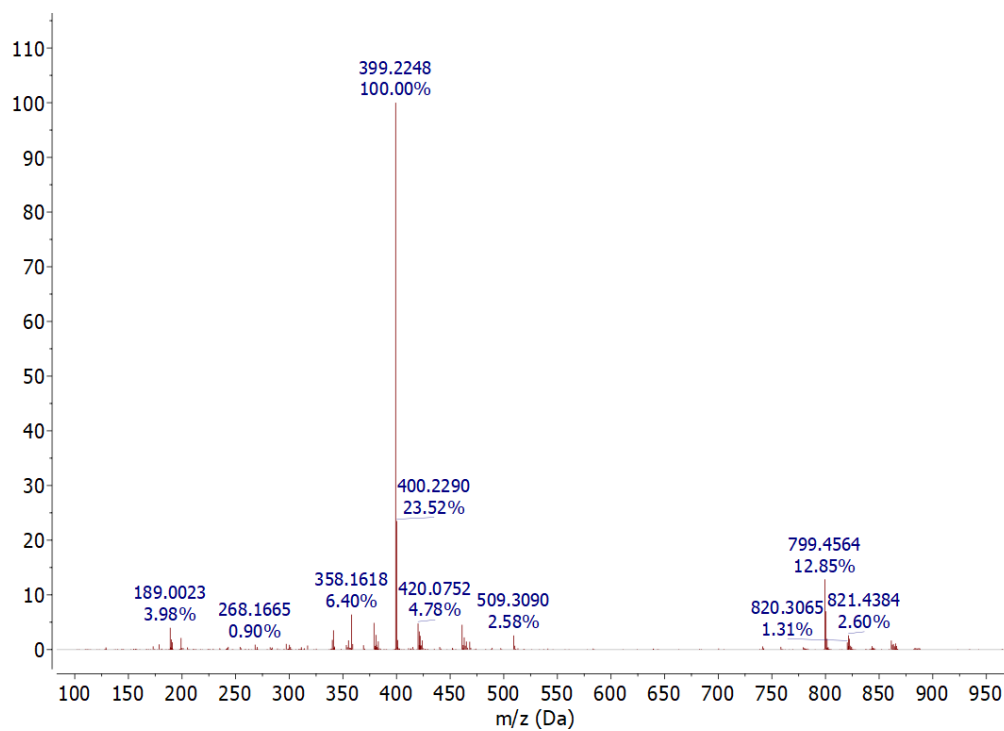

**Figure S17.** Experimental high resolution mass spectrum (ESI<sup>+</sup>) of H<sub>2</sub>L3.

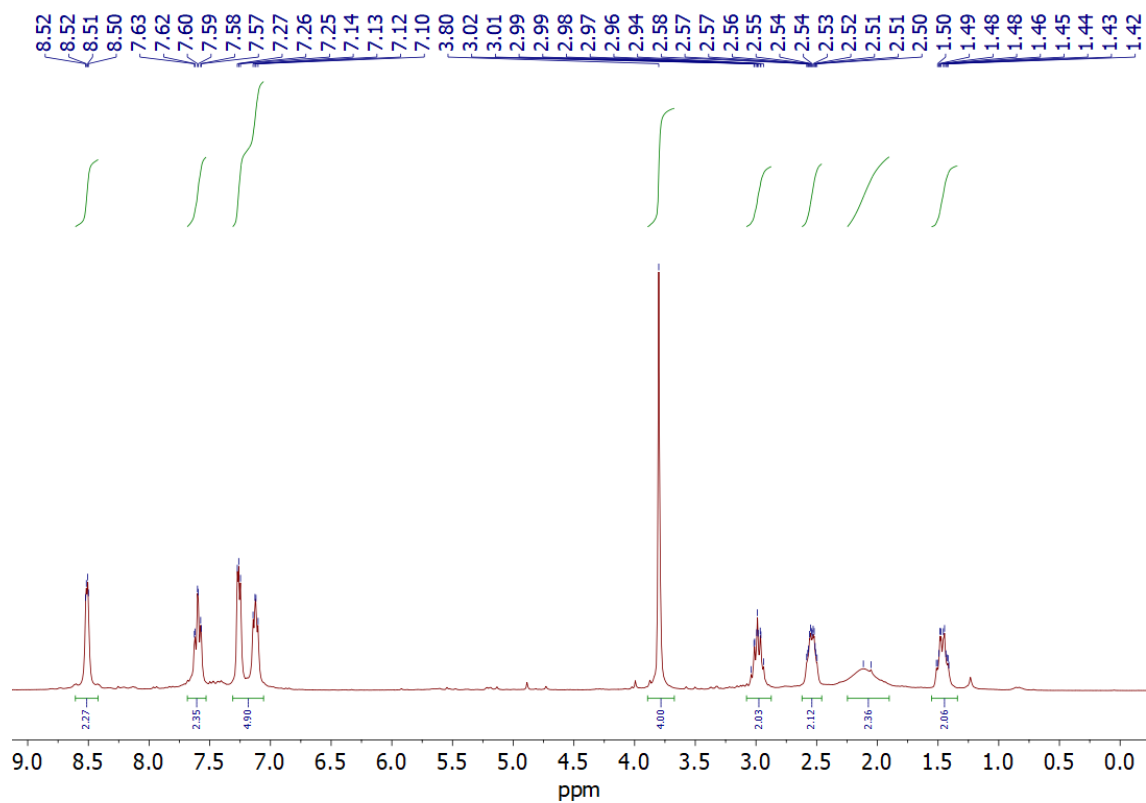

**Figure S18.**  $^1\text{H}$  NMR spectrum of compound **2** (300 MHz,  $\text{CDCl}_3$ , 298 K).

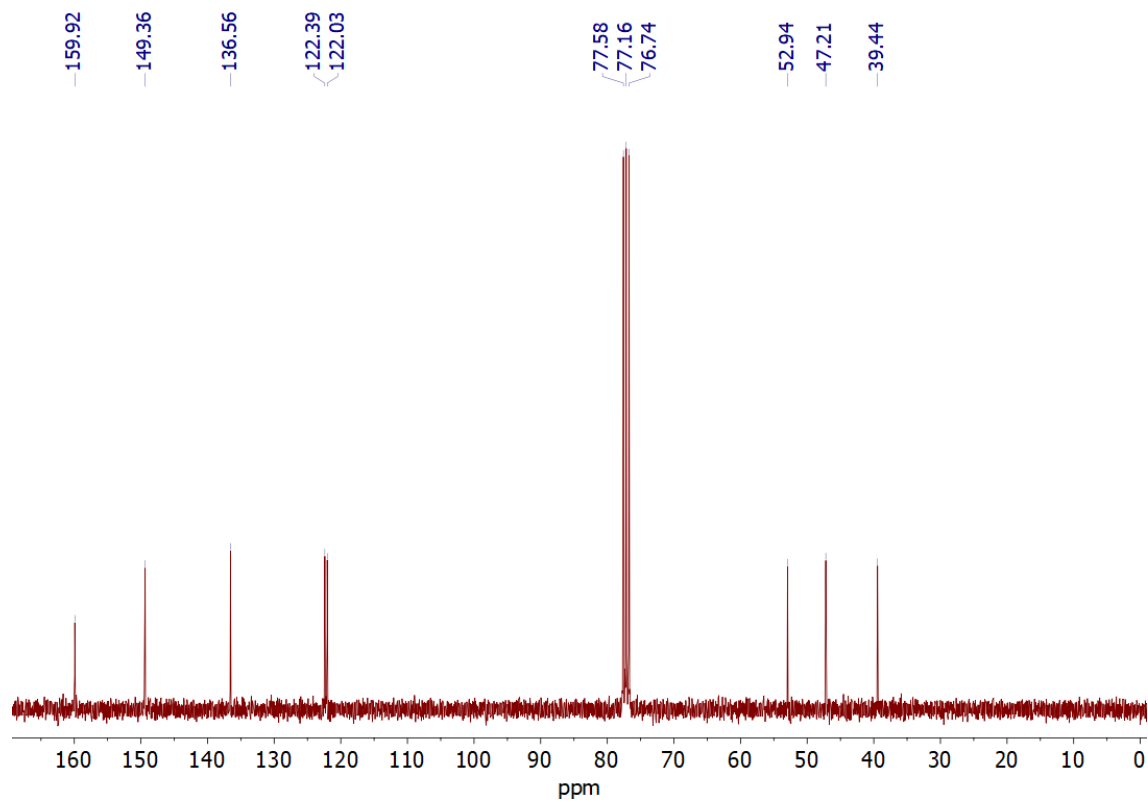

**Figure S19.**  $^{13}\text{C}$  NMR spectrum of compound **2** (75.5 MHz,  $\text{CDCl}_3$ , 298 K).

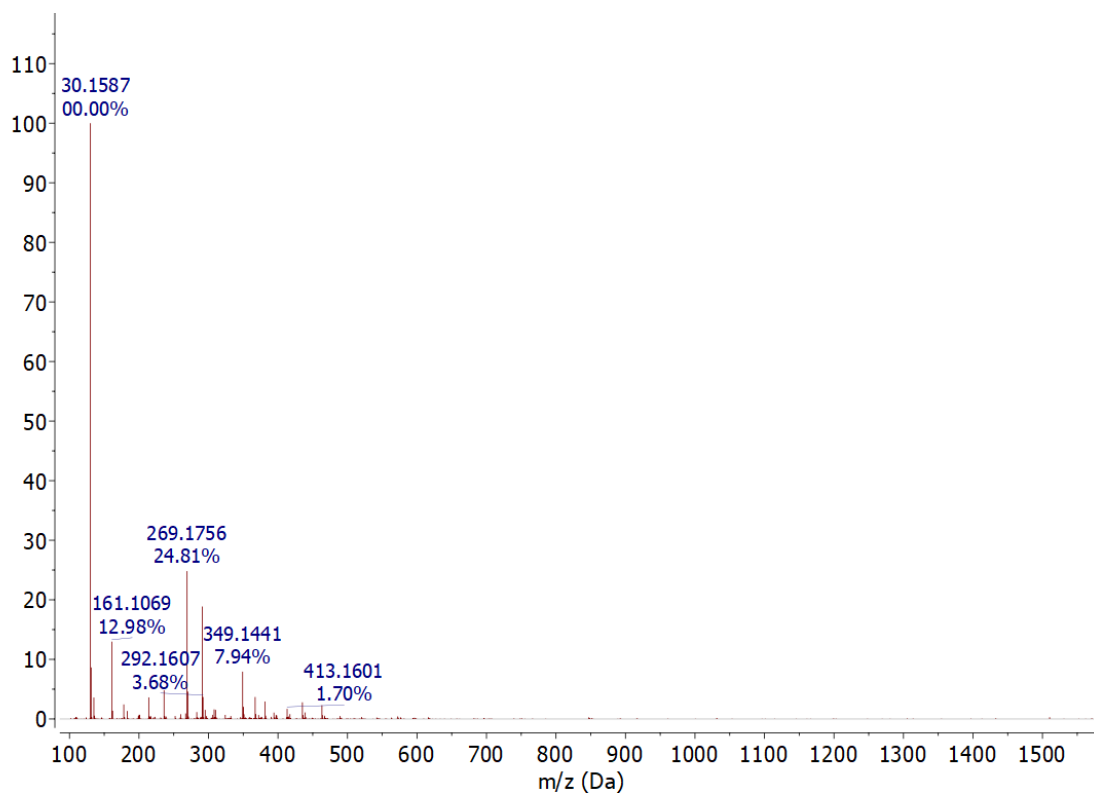

**Figure S20.** Experimental high resolution mass spectrum (ESI<sup>+</sup>) of compound **2**.

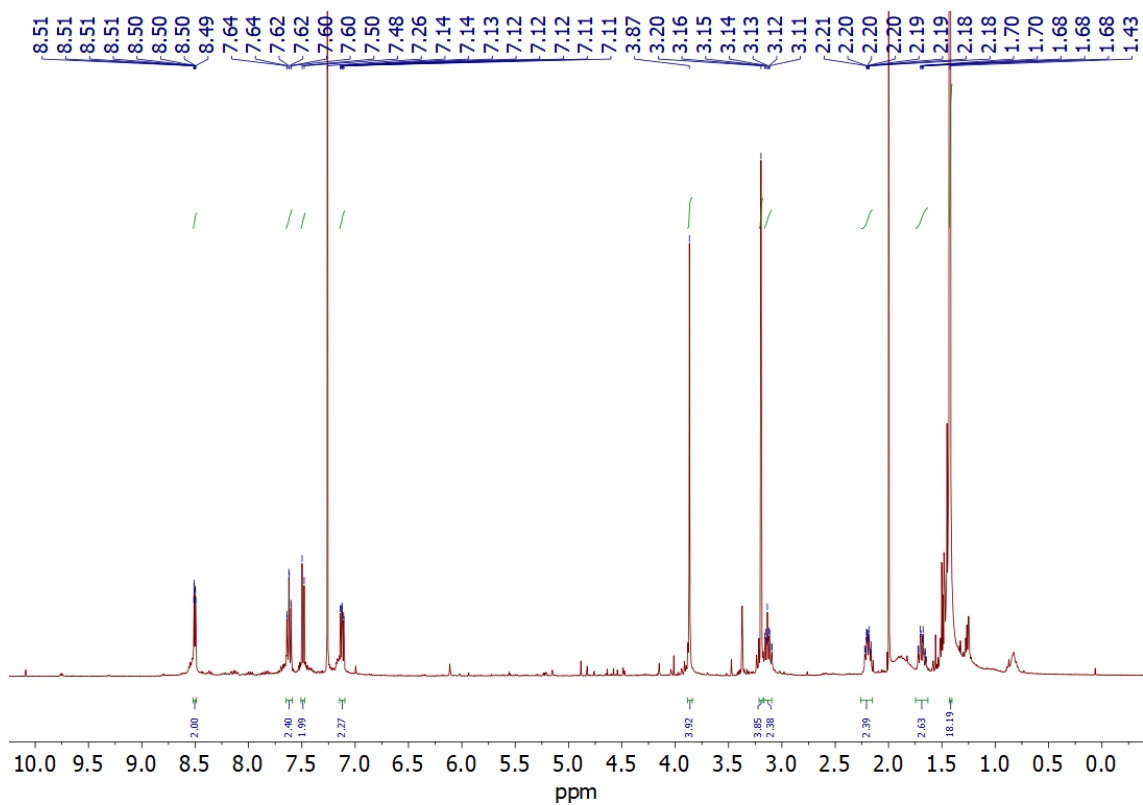

**Figure S21.**  $^1\text{H}$  NMR spectrum of compound **3** (400 MHz,  $\text{CDCl}_3$ , 298 K).

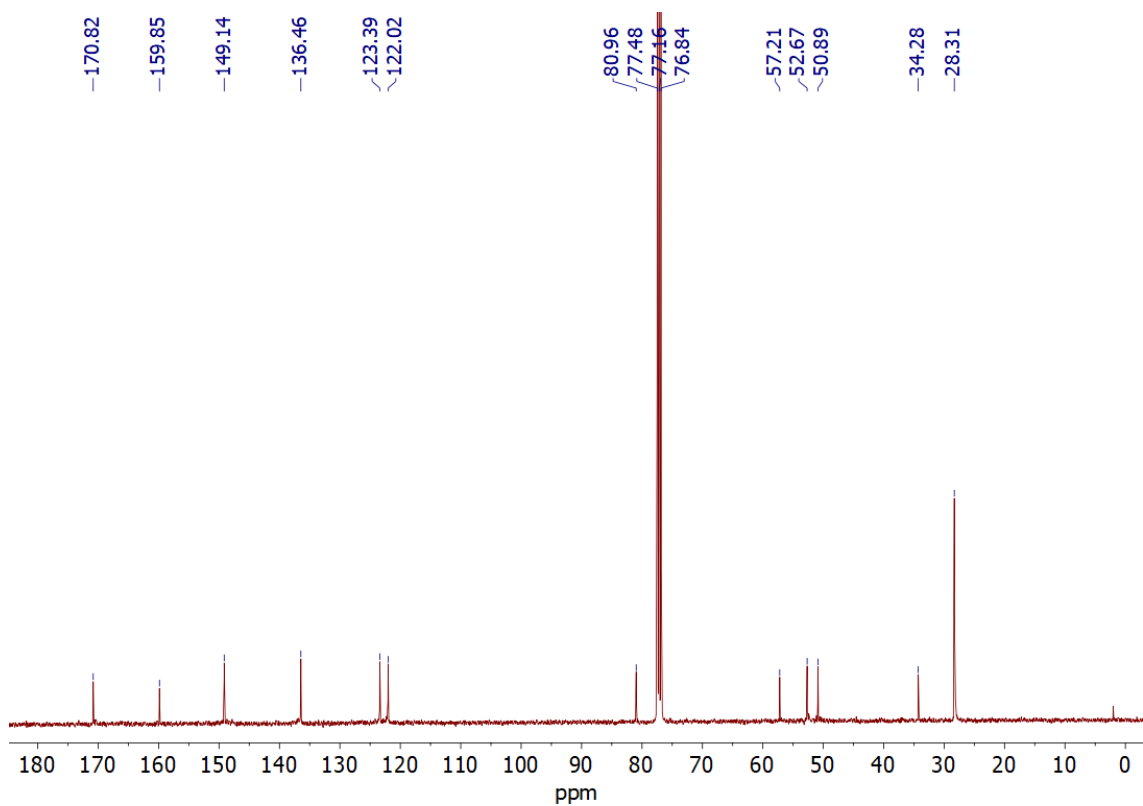

**Figure S22.**  $^{13}\text{C}$  NMR spectrum of compound **3** (101 MHz,  $\text{CDCl}_3$ , 298 K).

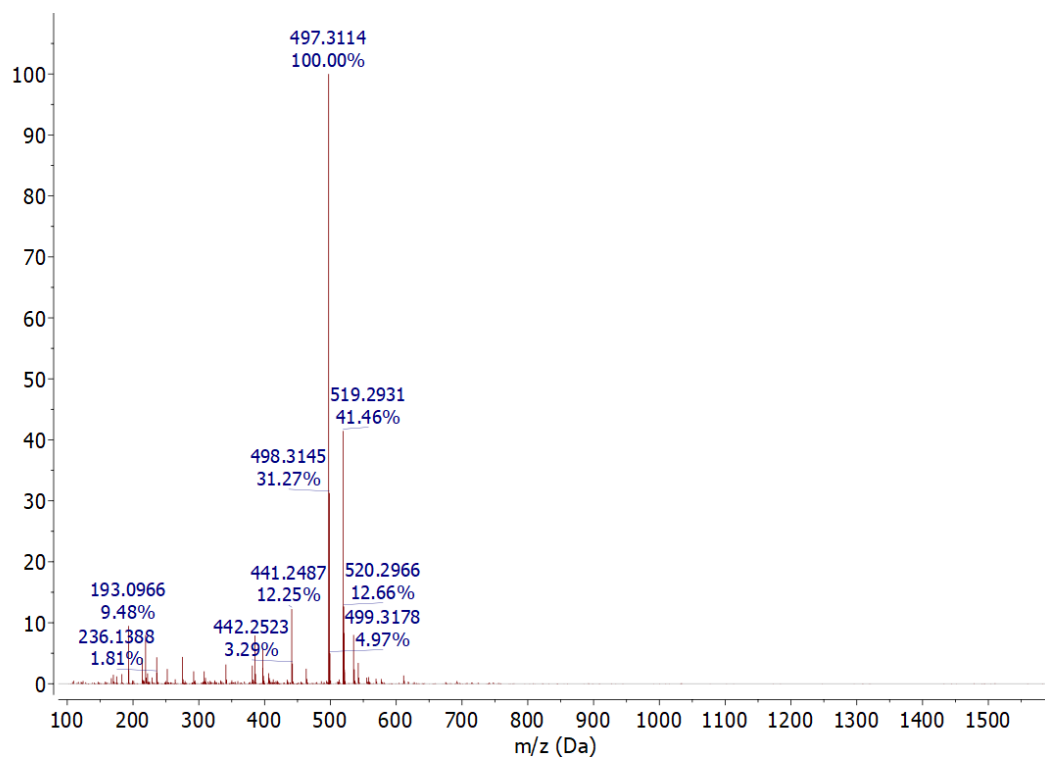

**Figure S23.** Experimental high resolution mass spectrum (ESI<sup>+</sup>) of compound **3**.

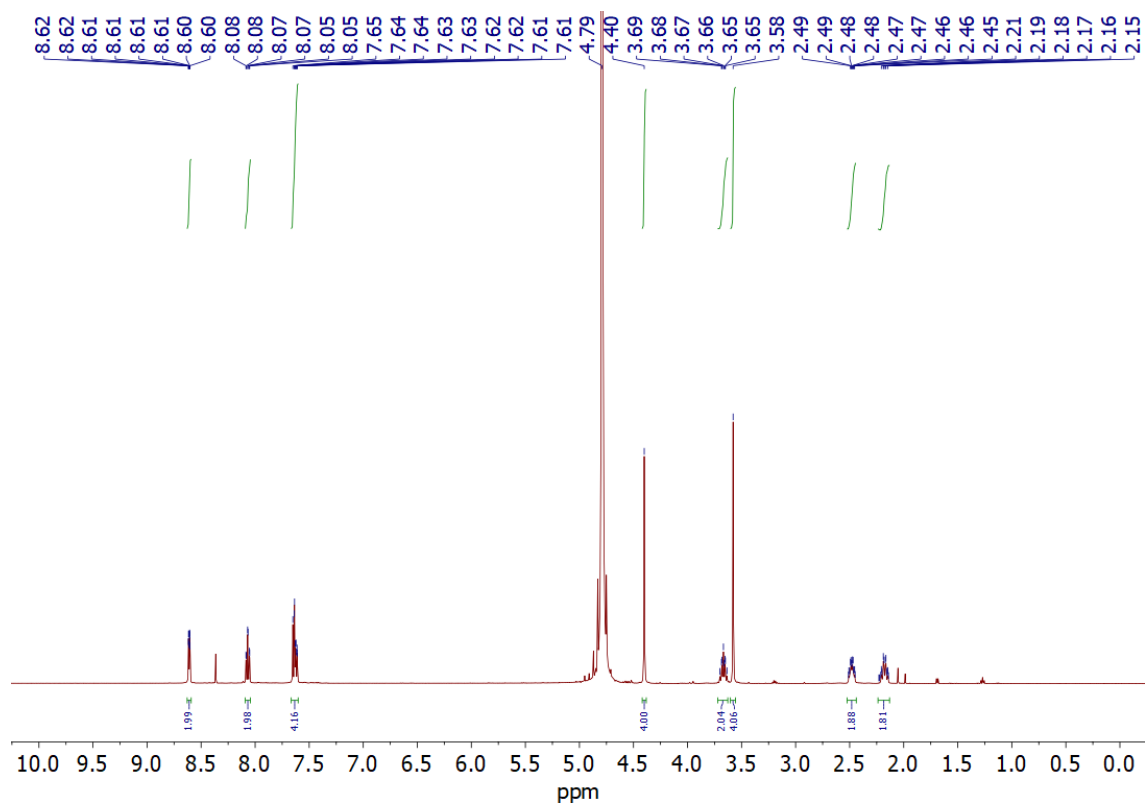

Figure S24.  $^1\text{H}$  NMR spectrum of  $\text{H}_2\text{L}_2$  (500 MHz,  $\text{D}_2\text{O}$ , pH 4.33, 298 K).

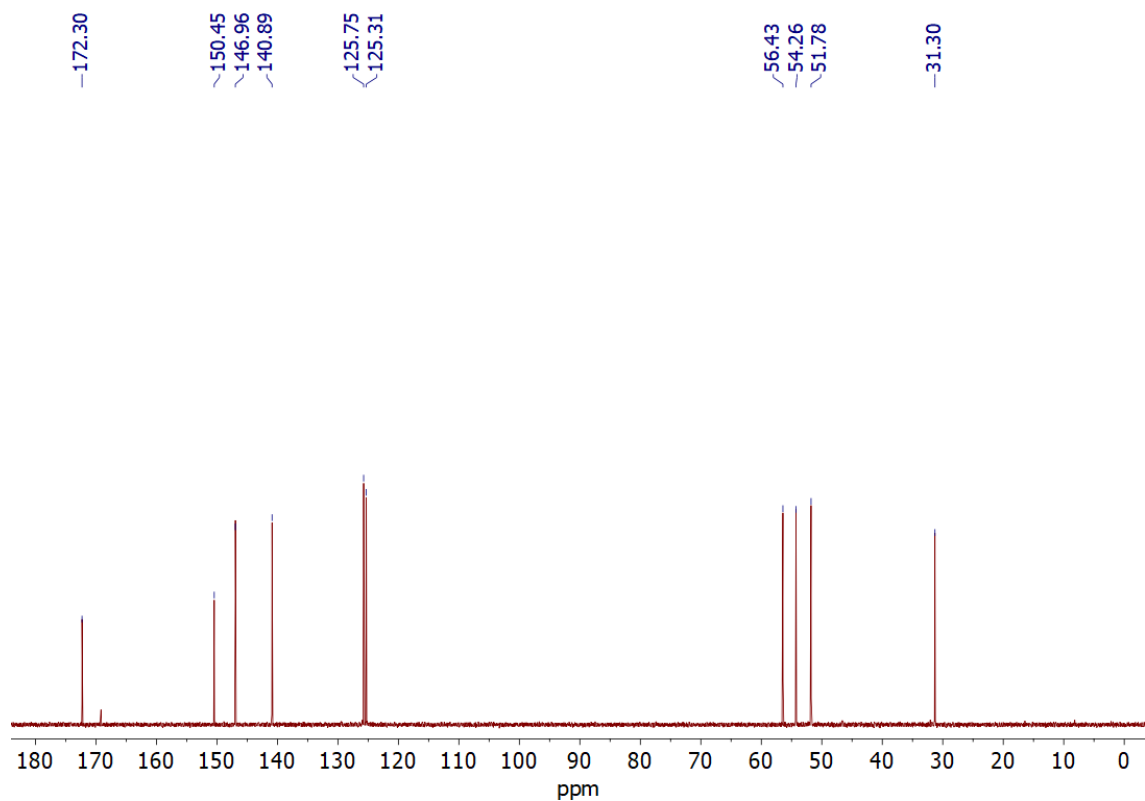

Figure S25.  $^{13}\text{C}$  NMR spectrum of  $\text{H}_2\text{L}_2$  (126 MHz,  $\text{D}_2\text{O}$ , pH 4.33, 298 K).

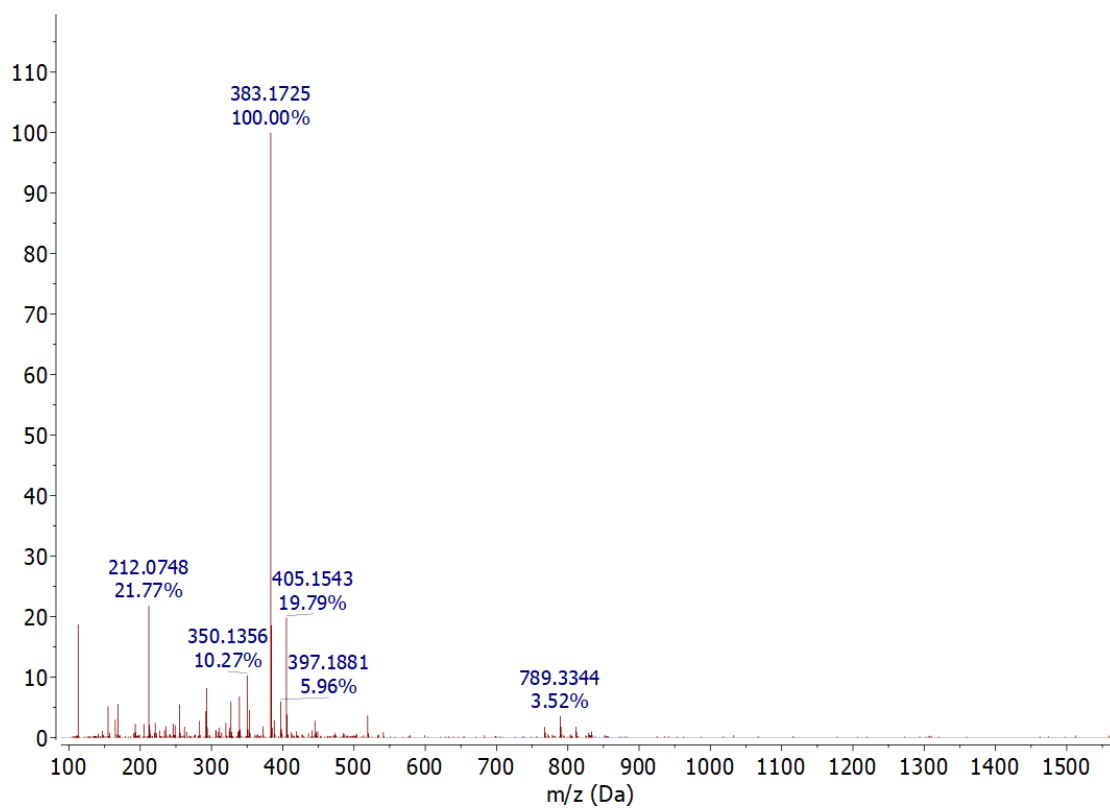

**Figure S26.** Experimental high resolution mass spectrum (ESI<sup>+</sup>) of H<sub>2</sub>L<sub>2</sub>.



**Table S1.** Optimized Cartesian coordinates obtained for  $[\text{Mn}(\text{EDTA})(\text{H}_2\text{O})]^{2-} \cdot 5\text{H}_2\text{O}$  (M11/Def2-TZVPP, scrf=pcm).

| Center<br>Number | Atomic<br>Number | Coordinates (Angstroms) |           |           |
|------------------|------------------|-------------------------|-----------|-----------|
|                  |                  | X                       | Y         | Z         |
| 1                | 8                | 2.261552                | -0.721128 | 1.366625  |
| 2                | 8                | 3.750417                | -2.382156 | 1.260291  |
| 3                | 8                | 2.701827                | 3.027558  | -1.478846 |
| 4                | 8                | 1.004032                | 1.892436  | -0.575313 |
| 5                | 8                | -0.271492               | -2.128191 | 0.636871  |
| 6                | 8                | -1.986805               | -3.529899 | 0.378332  |
| 7                | 8                | -1.692816               | 1.014165  | 0.145010  |
| 8                | 8                | -2.735047               | 2.265054  | -1.378289 |
| 9                | 7                | -0.825286               | -0.766197 | -1.630219 |
| 10               | 7                | 2.059633                | -0.496606 | -1.281584 |
| 11               | 6                | 0.130306                | -1.424389 | -2.523239 |
| 12               | 1                | 0.307937                | -2.429204 | -2.122554 |
| 13               | 6                | 1.447073                | -0.666505 | -2.601325 |
| 14               | 1                | 1.272186                | 0.334416  | -3.012327 |
| 15               | 6                | 2.714200                | -1.691634 | -0.769513 |
| 16               | 1                | 2.066552                | -2.560406 | -0.932371 |
| 17               | 1                | 3.676891                | -1.891989 | -1.263209 |
| 18               | 6                | 2.944708                | -1.603146 | 0.748077  |
| 19               | 6                | 2.937936                | 0.667941  | -1.258319 |
| 20               | 1                | 3.592876                | 0.605968  | -0.382152 |
| 21               | 1                | 3.577375                | 0.724281  | -2.150713 |
| 22               | 6                | 2.158356                | 1.984288  | -1.111716 |
| 23               | 6                | -1.823014               | -1.706192 | -1.137159 |
| 24               | 1                | -2.700047               | -1.155887 | -0.778487 |
| 25               | 1                | -2.171675               | -2.393118 | -1.922380 |
| 26               | 6                | -1.313942               | -2.531843 | 0.054628  |
| 27               | 6                | -1.424692               | 0.445541  | -2.165613 |
| 28               | 1                | -0.658609               | 1.053647  | -2.657477 |
| 29               | 1                | -2.215883               | 0.242340  | -2.902996 |
| 30               | 6                | -2.005078               | 1.314762  | -1.042782 |
| 31               | 8                | 0.078029                | 0.976752  | 2.364094  |
| 32               | 1                | 0.814200                | 0.891704  | 2.998369  |
| 33               | 1                | -0.080157               | 1.926290  | 2.169650  |
| 34               | 8                | -0.176083               | 3.518449  | 1.339225  |
| 35               | 8                | 2.350885                | 0.298522  | 3.823724  |
| 36               | 1                | 0.196262                | 3.097478  | 0.539095  |
| 37               | 1                | -1.116903               | 3.699795  | 1.151311  |
| 38               | 1                | 2.259978                | -0.327676 | 4.545952  |
| 39               | 1                | 2.464222                | -0.219287 | 2.991011  |
| 40               | 25               | 0.349857                | -0.025432 | 0.356829  |
| 41               | 8                | -3.320702               | -0.446996 | 1.958325  |
| 42               | 1                | -2.778018               | 0.074732  | 1.344189  |
| 43               | 1                | -3.787519               | -1.123495 | 1.441748  |
| 44               | 8                | -4.544749               | -2.659550 | 0.602988  |
| 45               | 8                | -2.886507               | 3.942854  | 0.741727  |
| 46               | 1                | -2.912637               | 3.324878  | -0.029374 |
| 47               | 1                | -3.163619               | 4.805744  | 0.424201  |
| 48               | 1                | -5.038675               | -2.637864 | -0.220202 |
| 49               | 1                | -3.690788               | -3.112296 | 0.425163  |
| 50               | 1                | -0.286421               | -1.549908 | -3.535185 |
| 51               | 1                | 2.130157                | -1.180626 | -3.295716 |

E (UM11) = -2709.8497385 Hartree

|                                              |              |
|----------------------------------------------|--------------|
| Zero-point correction=                       | 0.387377     |
| Thermal correction to Energy=                | 0.422871     |
| Thermal correction to Enthalpy=              | 0.423815     |
| Thermal correction to Gibbs Free Energy=     | 0.318406     |
| Sum of electronic and zero-point Energies=   | -2709.462361 |
| Sum of electronic and thermal Energies=      | -2709.426867 |
| Sum of electronic and thermal Enthalpies=    | -2709.425923 |
| Sum of electronic and thermal Free Energies= | -2709.531333 |

**Table S2.** Optimized Cartesian coordinates obtained for  $[\text{Mn}(\text{L1})(\text{H}_2\text{O})]^{2+} \cdot 5\text{H}_2\text{O}$  (M11/Def2-TZVPP, scrf=pcm).

| Center<br>Number | Atomic<br>Number | Coordinates (Angstroms) |           |           |
|------------------|------------------|-------------------------|-----------|-----------|
|                  |                  | X                       | Y         | Z         |
| 1                | 8                | 2.122059                | 0.345133  | 1.722947  |
| 2                | 8                | 3.890679                | -0.751677 | 2.525078  |
| 3                | 8                | 2.593410                | 2.323780  | -2.459712 |
| 4                | 8                | 0.935342                | 1.591560  | -1.161243 |
| 5                | 8                | -0.297858               | -1.577165 | 1.421157  |
| 6                | 8                | -1.876074               | -3.130765 | 1.645132  |
| 7                | 8                | -1.812036               | 0.996554  | -0.105930 |
| 8                | 8                | -3.155839               | 1.526241  | -1.804123 |
| 9                | 7                | -0.884104               | -1.217005 | -1.296804 |
| 10               | 7                | 2.274956                | -0.826038 | -0.685456 |
| 11               | 6                | 3.019758                | -1.430459 | 0.417030  |
| 12               | 1                | 2.535849                | -2.369840 | 0.704482  |
| 13               | 1                | 4.056925                | -1.663208 | 0.135921  |
| 14               | 6                | 3.032401                | -0.544825 | 1.664222  |
| 15               | 6                | 2.989071                | 0.338771  | -1.222901 |
| 16               | 1                | 3.632624                | 0.755940  | -0.441182 |
| 17               | 1                | 3.640544                | 0.057719  | -2.060454 |
| 18               | 6                | 2.103420                | 1.513604  | -1.671311 |
| 19               | 6                | -1.764559               | -2.018014 | -0.440324 |
| 20               | 1                | -2.724760               | -1.503554 | -0.318387 |
| 21               | 1                | -1.988469               | -2.992282 | -0.895311 |
| 22               | 6                | -1.261551               | -2.267697 | 0.990151  |
| 23               | 6                | -1.658620               | -0.286531 | -2.111219 |
| 24               | 1                | -1.002567               | 0.194000  | -2.842617 |
| 25               | 1                | -2.463179               | -0.788692 | -2.668126 |
| 26               | 6                | -2.265421               | 0.835559  | -1.273736 |
| 27               | 8                | -0.235731               | 1.865323  | 1.924236  |
| 28               | 1                | 0.460532                | 2.119331  | 2.550736  |
| 29               | 1                | -0.421566               | 2.632437  | 1.348366  |
| 30               | 8                | -0.433949               | 3.800475  | -0.063719 |
| 31               | 8                | 2.005875                | 2.200397  | 3.629954  |
| 32               | 1                | -0.036042               | 3.114201  | -0.626236 |
| 33               | 1                | -1.384151               | 3.837281  | -0.273340 |
| 34               | 1                | 1.931069                | 1.852637  | 4.519970  |
| 35               | 1                | 2.206037                | 1.439399  | 3.035977  |
| 36               | 25               | 0.294441                | 0.218254  | 0.388705  |
| 37               | 8                | -3.468715               | 0.164837  | 2.054448  |
| 38               | 1                | -2.892169               | 0.464267  | 1.334883  |
| 39               | 1                | -3.861338               | -0.677403 | 1.783724  |
| 40               | 8                | -4.507395               | -2.471346 | 1.522972  |
| 41               | 8                | -3.207922               | 3.879922  | -0.498695 |
| 42               | 1                | -3.277041               | 3.009809  | -0.958910 |
| 43               | 1                | -3.565908               | 4.540457  | -1.093879 |
| 44               | 1                | -4.963196               | -2.784678 | 0.740179  |
| 45               | 1                | -3.615030               | -2.875781 | 1.522152  |
| 46               | 6                | 2.049787                | -1.824353 | -1.737165 |
| 47               | 6                | -0.063004               | -2.081286 | -2.151523 |
| 48               | 6                | 0.989701                | -2.880413 | -1.352627 |
| 49               | 6                | 1.094556                | -1.328317 | -2.841825 |
| 50               | 1                | 0.989368                | -0.249540 | -2.957489 |
| 51               | 1                | 1.336809                | -1.774271 | -3.807650 |
| 52               | 1                | 0.795747                | -3.017801 | -0.288472 |

|    |   |           |           |           |
|----|---|-----------|-----------|-----------|
| 53 | 1 | 1.199330  | -3.845086 | -1.817107 |
| 54 | 1 | -0.709266 | -2.674702 | -2.814251 |
| 55 | 1 | 3.014858  | -2.218085 | -2.087428 |

-----  
E(UM11) =-2787.2538319 Hartree

|                                              |              |
|----------------------------------------------|--------------|
| Zero-point correction=                       | 0.422863     |
| Thermal correction to Energy=                | 0.459836     |
| Thermal correction to Enthalpy=              | 0.460781     |
| Thermal correction to Gibbs Free Energy=     | 0.353138     |
| Sum of electronic and zero-point Energies=   | -2786.830968 |
| Sum of electronic and thermal Energies=      | -2786.793995 |
| Sum of electronic and thermal Enthalpies=    | -2786.793051 |
| Sum of electronic and thermal Free Energies= | -2786.900694 |

**Table S3.** Optimized Cartesian coordinates obtained for [Mn(L2)(H<sub>2</sub>O)]·2H<sub>2</sub>O (M11/Def2-TZVPP, scrf=pcm).

| Center Number | Atomic Number | Coordinates (Angstroms) |           |           |
|---------------|---------------|-------------------------|-----------|-----------|
|               |               | X                       | Y         | Z         |
| 1             | 8             | -1.414509               | -1.210616 | -3.604071 |
| 2             | 8             | 0.049343                | -0.880019 | -1.959427 |
| 3             | 8             | -0.168795               | 0.913961  | 1.889221  |
| 4             | 8             | 0.771472                | 2.172841  | 3.471279  |
| 5             | 7             | 1.788670                | 1.597752  | 0.045042  |
| 6             | 7             | -1.270948               | 1.451100  | -1.106282 |
| 7             | 6             | -2.436981               | 1.632986  | -0.237180 |
| 8             | 1             | -2.111095               | 2.114977  | 0.689518  |
| 9             | 1             | -3.183229               | 2.288605  | -0.711653 |
| 10            | 6             | -1.641821               | 0.797434  | -2.376195 |
| 11            | 1             | -2.720580               | 0.625259  | -2.428251 |
| 12            | 1             | -1.395801               | 1.452849  | -3.219808 |
| 13            | 6             | -0.961524               | -0.547326 | -2.673578 |
| 14            | 6             | 2.016680                | 1.817384  | 1.480120  |
| 15            | 1             | 2.733613                | 1.071302  | 1.841814  |
| 16            | 1             | 2.451644                | 2.807143  | 1.670063  |
| 17            | 6             | 0.772075                | 1.642946  | 2.363836  |
| 18            | 6             | 3.018236                | 1.138430  | -0.606731 |
| 19            | 1             | 2.867468                | 1.179058  | -1.691063 |
| 20            | 1             | 3.858156                | 1.810117  | -0.374787 |
| 21            | 8             | -0.038389               | -2.008104 | 1.481084  |
| 22            | 1             | -0.756685               | -1.843855 | 2.119018  |
| 23            | 1             | -0.259123               | -2.758118 | 0.909401  |
| 24            | 8             | -0.257258               | -3.411802 | -0.909441 |
| 25            | 8             | -1.825304               | -0.795641 | 3.215023  |
| 26            | 1             | -0.083392               | -2.634150 | -1.474640 |
| 27            | 1             | 0.212810                | -4.157272 | -1.286548 |
| 28            | 1             | -1.311487               | -0.029506 | 2.887923  |
| 29            | 1             | -1.712656               | -0.824586 | 4.166841  |
| 30            | 25            | 0.151648                | -0.199027 | 0.065316  |
| 31            | 6             | -0.652194               | 2.757199  | -1.377707 |
| 32            | 6             | 1.375495                | 2.846222  | -0.618375 |
| 33            | 6             | 0.017429                | 3.402168  | -0.147758 |
| 34            | 6             | 0.746755                | 2.594521  | -2.008229 |
| 35            | 1             | 0.945285                | 1.620117  | -2.463281 |
| 36            | 1             | 0.981765                | 3.389152  | -2.717233 |
| 37            | 1             | -0.342320               | 3.113259  | 0.837630  |
| 38            | 1             | 0.002101                | 4.490080  | -0.227732 |
| 39            | 1             | 2.208641                | 3.561819  | -0.588208 |
| 40            | 1             | -1.358353               | 3.397959  | -1.923014 |
| 41            | 6             | -3.090091               | 0.320304  | 0.112834  |
| 42            | 6             | -4.435658               | 0.277386  | 0.457632  |
| 43            | 6             | -5.014162               | -0.943227 | 0.746524  |
| 44            | 1             | -5.014329               | 1.195705  | 0.482748  |
| 45            | 6             | -2.905249               | -1.954085 | 0.319129  |
| 46            | 6             | -4.236926               | -2.088485 | 0.659761  |
| 47            | 1             | -6.063942               | -1.004598 | 1.018325  |
| 48            | 1             | -2.269147               | -2.830067 | 0.224815  |
| 49            | 1             | -4.653243               | -3.071427 | 0.851163  |
| 50            | 6             | 3.389430                | -0.276320 | -0.244771 |
| 51            | 6             | 4.716868                | -0.679686 | -0.294868 |
| 52            | 6             | 5.027896                | -1.998730 | -0.025420 |

|    |   |           |           |           |
|----|---|-----------|-----------|-----------|
| 53 | 1 | 5.488459  | 0.042247  | -0.543637 |
| 54 | 6 | 2.710103  | -2.385392 | 0.343420  |
| 55 | 6 | 4.002322  | -2.872805 | 0.297406  |
| 56 | 1 | 6.058214  | -2.340350 | -0.060926 |
| 57 | 1 | 1.884190  | -3.035754 | 0.607445  |
| 58 | 1 | 4.196159  | -3.916297 | 0.519945  |
| 59 | 7 | -2.334350 | -0.773881 | 0.065569  |
| 60 | 7 | 2.403928  | -1.113324 | 0.076071  |

-----  
E(UM11) =-2675.6549597 Hartree

|                                              |              |
|----------------------------------------------|--------------|
| Zero-point correction=                       | 0.483341     |
| Thermal correction to Energy=                | 0.516321     |
| Thermal correction to Enthalpy=              | 0.517266     |
| Thermal correction to Gibbs Free Energy=     | 0.418109     |
| Sum of electronic and zero-point Energies=   | -2675.171619 |
| Sum of electronic and thermal Energies=      | -2675.138638 |
| Sum of electronic and thermal Enthalpies=    | -2675.137694 |
| Sum of electronic and thermal Free Energies= | -2675.236850 |

**Table S4.** Optimized Cartesian coordinates obtained for [Mn(L3)(H<sub>2</sub>O)]·2H<sub>2</sub>O (M11/Def2-TZVPP, scrf=pcm).

| Center Number | Atomic Number | Coordinates (Angstroms) |           |           |
|---------------|---------------|-------------------------|-----------|-----------|
|               |               | X                       | Y         | Z         |
| 1             | 8             | -2.310244               | 0.748621  | -0.644473 |
| 2             | 8             | -0.258209               | 1.642506  | 3.529054  |
| 3             | 8             | 0.453754                | 1.142015  | 1.476107  |
| 4             | 8             | -0.373493               | -1.253083 | -1.904983 |
| 5             | 8             | 0.431493                | -2.963931 | -3.086719 |
| 6             | 8             | 2.121413                | 0.822568  | -1.080476 |
| 7             | 7             | 1.598981                | -1.559300 | 0.037775  |
| 8             | 7             | -1.344433               | -0.945287 | 1.247362  |
| 9             | 6             | -2.600939               | -1.287852 | 0.594850  |
| 10            | 1             | -2.436905               | -2.134527 | -0.081131 |
| 11            | 1             | -3.380589               | -1.579498 | 1.315900  |
| 12            | 6             | -3.094715               | -0.139387 | -0.261025 |
| 13            | 6             | -1.538561               | 0.077569  | 2.283951  |
| 14            | 1             | -2.380764               | 0.722361  | 2.007395  |
| 15            | 1             | -1.781938               | -0.375107 | 3.254653  |
| 16            | 6             | -0.346643               | 1.029533  | 2.468349  |
| 17            | 6             | 1.757012                | -2.181736 | -1.284029 |
| 18            | 1             | 2.524056                | -1.643839 | -1.851651 |
| 19            | 1             | 2.091450                | -3.224112 | -1.195895 |
| 20            | 6             | 0.496658                | -2.145577 | -2.167187 |
| 21            | 6             | 2.814937                | -0.877838 | 0.459110  |
| 22            | 1             | 2.701354                | -0.540031 | 1.495012  |
| 23            | 1             | 3.701120                | -1.530659 | 0.412861  |
| 24            | 6             | 3.038705                | 0.362178  | -0.389702 |
| 25            | 8             | -0.025574               | 2.459566  | -1.206646 |
| 26            | 1             | -0.828269               | 3.008401  | -1.150986 |
| 27            | 1             | 0.699521                | 2.908742  | -0.735619 |
| 28            | 8             | 1.748636                | 3.411708  | 0.760811  |
| 29            | 8             | -2.601860               | 3.464308  | -1.099011 |
| 30            | 1             | 1.395639                | 2.600129  | 1.187599  |
| 31            | 1             | 2.704967                | 3.391530  | 0.846077  |
| 32            | 1             | -3.013460               | 3.765707  | -1.913395 |
| 33            | 1             | -2.743635               | 2.503101  | -1.034462 |
| 34            | 25            | -0.024082               | 0.283106  | -0.469312 |
| 35            | 6             | -0.757826               | -2.161031 | 1.835662  |
| 36            | 6             | 1.214761                | -2.569545 | 1.032928  |
| 37            | 6             | -0.196991               | -3.144112 | 0.786362  |
| 38            | 6             | 0.684470                | -1.965152 | 2.349676  |
| 39            | 1             | 1.002685                | -0.955002 | 2.605676  |
| 40            | 1             | 0.886282                | -2.630835 | 3.191256  |
| 41            | 1             | -0.595742               | -3.081144 | -0.226514 |
| 42            | 1             | -0.268433               | -4.174478 | 1.140177  |
| 43            | 1             | 2.018822                | -3.313477 | 1.134736  |
| 44            | 1             | -1.463500               | -2.587395 | 2.563853  |
| 45            | 7             | -4.372762               | -0.141473 | -0.589604 |
| 46            | 7             | 4.242290                | 0.917416  | -0.330654 |
| 47            | 1             | -4.965144               | -0.866587 | -0.213732 |
| 48            | 1             | 4.951878                | 0.459339  | 0.221449  |
| 49            | 6             | -4.954586               | 0.866414  | -1.461417 |
| 50            | 1             | -5.931091               | 0.518468  | -1.797087 |
| 51            | 1             | -5.075230               | 1.816009  | -0.930148 |
| 52            | 1             | -4.307001               | 1.016608  | -2.329340 |

|    |   |          |          |           |
|----|---|----------|----------|-----------|
| 53 | 6 | 4.598973 | 2.117777 | -1.068600 |
| 54 | 1 | 5.172753 | 1.867818 | -1.966063 |
| 55 | 1 | 3.679281 | 2.625759 | -1.362839 |
| 56 | 1 | 5.196572 | 2.773912 | -0.432036 |

-----  
E(UM11) =-2597.5663425 Hartree

|                                              |              |
|----------------------------------------------|--------------|
| Zero-point correction=                       | 0.454371     |
| Thermal correction to Energy=                | 0.487784     |
| Thermal correction to Enthalpy=              | 0.488728     |
| Thermal correction to Gibbs Free Energy=     | 0.388868     |
| Sum of electronic and zero-point Energies=   | -2597.111972 |
| Sum of electronic and thermal Energies=      | -2597.078559 |
| Sum of electronic and thermal Enthalpies=    | -2597.077615 |
| Sum of electronic and thermal Free Energies= | -2597.177474 |



## References

1F. K. Kálmán and G. Tircsó, *Inorg. Chem.*, 2012, **51**, 10065–10067.
